1 **Identification of a novel family of benzimidazole species-selective Complex I inhibitors as**  
2 **potential anthelmintics**

3  
4 **Authors**

5  
6 **Taylor Davie<sup>1</sup>, Xènia Serrat<sup>1</sup>, Jamie Snider<sup>1</sup>, Igor Štagljar<sup>1</sup>, Hiroyuki Hirano<sup>2</sup>, Nobumoto**  
7 **Watanabe<sup>2</sup>, Hiroyuki Osada<sup>2,3</sup> and Andrew G Fraser<sup>1,\*</sup>**

8  
9 <sup>1</sup>The Donnelly Centre, University of Toronto, 160 College Street, Toronto M5S3E1, Canada.

10 <sup>2</sup>Chemical Resource Development Research Unit, RIKEN Center for Sustainable Resource  
11 Science, 2-1 Hirosawa, Wako Saitama 351-0198, Japan

12 <sup>3</sup>Department of Pharmaceutical Sciences, University of Shizuoka, 52-1 Yada, Suruga-ku,  
13 Shizuoka 422-8526, Japan

14  
15 \* Corresponding author: [andy.fraser@utoronto.ca](mailto:andy.fraser@utoronto.ca)  
16  
17  
18

19 **Abstract**

20 **Soil-transmitted helminths (STHs) including *Ascaris*, hookworm, and whipworm are major**  
21 **human pathogens infecting over a billion people worldwide<sup>1,2</sup>. There are few existing classes**  
22 **of anthelmintics and resistance is increasing<sup>3-5</sup> — there is thus an urgent need for new classes**  
23 **of these drugs. Here we focus on identifying compounds that interfere with the unusual**  
24 **anaerobic metabolism that STHs use to survive the highly hypoxic conditions of the host gut<sup>6-</sup>**  
25 **<sup>9</sup>. This requires rhodoquinone (RQ), a quinone electron carrier that is not made or used by the**  
26 **STH hosts<sup>10</sup>. We previously showed that *C. elegans* also uses this rhodoquinone-dependent**  
27 **metabolism (RQDM)<sup>11</sup> and established a high throughput assay for RQDM<sup>11</sup>. We screened a**  
28 **collection of 480 natural products for compounds that kill worms specifically when they rely**  
29 **on RQDM — these 480 are representatives of a full library of ~25,000 natural products and**  
30 **derivatives<sup>12,13</sup>. We identify several classes of compound including a novel family of species**  
31 **selective inhibitors of Complex I. These Complex I inhibitors are based on a benzimidazole**  
32 **core but unlike commercial benzimidazole anthelmintics they do not target microtubules<sup>14-17</sup>.**  
33 **We screened over 1,200 benzimidazoles and identify the key structural requirements for**  
34 **species selective Complex I inhibition. We suggest that these novel benzimidazole species-**  
35 **selective Complex I inhibitors may be potential anthelmintics.**  
36  
37

38 **Intro**

39 Soil-transmitted helminths (STHs from here on) are major pathogens of humans and  
40 livestock<sup>1,2</sup>. Over a billion humans are infected by STHs including roundworm (*Ascaris*  
41 *lumbricoides*, hookworm (*Necator americanus* and *Ancylostoma duodenale*), and whipworm  
42 (*Trichuris trichiura*). These infections result in malnutrition, malaise and weakness, and can  
43 cause developmental defects and impaired growth in children<sup>18</sup>. In addition, STHs infect a high  
44 proportion of livestock leading to reduced yield. This is a particular problem in poorer

45 communities where such losses can have major health and economic consequences. There are  
46 excellent frontline anthelmintics including benzimidazoles (e.g. albendazole and  
47 mebendazole)<sup>19,20</sup> and macrocyclic lactones (e.g. ivermectin)<sup>21,22</sup>. However, there are few  
48 classes of commercial anthelmintics and resistance to these drugs is widespread in livestock  
49 and is now occurring in human parasites as well. There is thus an urgent need for new classes of  
50 anthelmintic drugs to control and treat these major pathogens which present a key challenge in  
51 global health.

52  
53 Any effective anthelmintic must target the STH without harming the vertebrate host. One way  
54 to do this is to develop drugs that target a process that is essential for the STH but absent from  
55 the host and that is the approach we take here. We focus on a unique aspect of STH  
56 metabolism — rhodoquinone-dependent metabolism (RQDM)<sup>6,7,9,23</sup>. During the stages of the  
57 lifecycle when the STH lives in the soil outside the host, it generates energy using oxidative  
58 phosphorylation. Electrons enter the mitochondrial electron transport chain (ETC) either at  
59 Complex I or via quinone-coupled dehydrogenases (QDHs) like Complex II, succinate  
60 dehydrogenase. They are transferred to ubiquinone (UQ) and then pass through Complex III  
61 and Complex IV where they ultimately are accepted by molecular oxygen as the terminal  
62 electron acceptor. As the electrons flow through the ETC, protons are translocated across the  
63 mitochondrial membrane, establishing a proton motive force which powers ATP synthesis by  
64 the F<sub>0</sub>F<sub>1</sub>-ATP synthase, Complex V (Fig 1a). This UQ-using oxidative ETC is identical between  
65 host and parasite. However, many STHs must survive extended periods in the highly anaerobic  
66 environment of the host gut — adult *Ascaris*, for example lives for months in these conditions.  
67 Without available oxygen as the terminal electron acceptor, the STHs cannot use the aerobic  
68 UQ-coupled ETC. However, STHs have a key adaptation that still allows them to use a rewired  
69 form of the ETC and it is this that provides the potential target for anthelmintics. Electrons still  
70 enter the ETC from NADH into Complex I and onto the quinone pool. Rather than flow through  
71 to Complex IV, they exit the ETC at Complex II which now acts as a fumarate reductase rather  
72 than a succinate dehydrogenase (Fig 1b). This allows fumarate to be used as a terminal electron  
73 acceptor. Crucially, UQ cannot be used as an electron carrier to power the fumarate reductase  
74 activity — instead STHs use rhodoquinone (RQ), a highly related quinone<sup>24–26</sup>. Since only STHs  
75 make and use RQ, RQ synthesis and RQDM provide a critical target that differs between host  
76 and parasite. If we could identify drugs that specifically target RQ synthesis or RQDM, they  
77 should kill the parasite without affecting the host — this is our goal here.

78  
79 We previously showed that the free-living nematode *C. elegans* makes and uses RQ<sup>11</sup>. We  
80 established a simple assay which allows us to measure RQDM *in vivo* and used this to dissect  
81 the pathway for RQ synthesis<sup>11</sup> and the key molecular switch that determines whether  
82 nematodes make UQ or RQ<sup>27</sup>. In brief, tryptophan is metabolised via the kynurenine pathway to  
83 generate 3-hydroxyanthranilate (3HA). 3HA is then used as a substrate by the polyprenyl  
84 transferase COQ-2 in the critical commitment step in RQ synthesis<sup>11,28</sup>. Mutations in the  
85 kynurenine pathway such as a *kynu-1* null mutation block 3HA generation and hence block RQ  
86 synthesis. Wild-type worms, in which ~10% of the quinone pool is RQ<sup>11,28</sup>, can readily survive  
87 treatment for 15hrs with 200µM potassium cyanide (KCN) but *kynu-1* worms that entirely lack  
88 RQ cannot survive this. We further showed that inhibitors of Complex I or Complex II, which

89 prevent either electron entry or exit from the RQ-dependent ETC, or mutations in the quinone-  
90 binding pocket of Complex II that prevent RQ binding kill worms in the presence of 200 $\mu$ M KCN  
91 (Fig 1c)<sup>11</sup>. *C. elegans* is thus an excellent model for RQDM and it is relatively easy to carry out  
92 high throughput drug screens *in vivo* in *C. elegans*.

93  
94 In this study, we screen a collection of 480 natural products and their derivatives<sup>12,13</sup> for  
95 compounds that affect our *C. elegans* model of RQDM. We identified multiple distinct structural  
96 groups of potential RQDM inhibitors and showed that several of these have highly specific  
97 effects on individual ETC complexes. These include a species-selective Complex II inhibitor,  
98 siccanin, that had not been previously shown to be active in nematodes, and a family of  
99 structurally related benzimidazole compounds that specifically and potently target Complex I.  
100 We showed Complex I inhibition is a novel activity for benzimidazoles — no commercial  
101 benzimidazoles have any effect on Complex I activity. Furthermore, we identified a small subset  
102 that show good species selectivity, inhibiting *C. elegans* Complex I with >10-fold lower doses  
103 than bovine or murine Complex I and that have no detectable effect on growth in normoxia. We  
104 have thus identified a new family of species-selective Complex I inhibitors that potently kill *C.*  
105 *elegans* under conditions where they require RQDM for survival. These are potential  
106 anthelmintics that may similarly kill STHs in the host gut where they rely on RQDM for survival.

107

## 108 **Results**

109

### 110 **A screen in *C. elegans* for natural products that inhibit RQ-dependent metabolism**

111 *C. elegans* is highly related to STHs<sup>29</sup> and *C. elegans* makes and uses RQ<sup>11,28</sup>. It is thus an  
112 excellent system for screens to identify compounds that specifically block RQ synthesis and RQ-  
113 dependent metabolism (RQDM). We previously showed that *C. elegans* requires RQ synthesis  
114 and RQDM to survive exposure to KCN for 15hrs<sup>11</sup>. This observation is the basis for a previously  
115 published image-based movement assay for RQDM. In outline, we treat *C. elegans* L1 larvae  
116 with 200  $\mu$ M KCN for 15hrs — wild-type worms that can produce RQ are immobile but alive and  
117 if we remove the KCN by dilution they rapidly recover movement (Fig 2a). However, worms that  
118 cannot make RQ (e.g. that have mutations in the kynurenine pathway (Fig 2a)) or that cannot  
119 carry out RQDM (e.g. due to inhibition of Complex I or Complex II (Fig 2b)) are dead after 15hr  
120 KCN treatment and hence no recovery of movement is seen. This allows a simple drug screen  
121 for products that specifically kill *C. elegans* when they require RQDM for survival. Worms are  
122 treated with 200  $\mu$ M KCN with either test compounds or DMSO only controls and KCN is  
123 removed after 15hrs and movement measured 3hrs later. If worms recover movement similar  
124 to controls, then the compound does not affect RQDM. However, if worms are dead after 15hr  
125 KCN treatment in the presence of the test compound, no recovery is seen — that compound is  
126 thus a potential inhibitor of RQDM. Finally, to ensure that the compound's effect is specific for  
127 RQDM and not some more general effect on worm viability, we also examine the effect of each  
128 compound on the growth and viability of worms in normoxia where they do not require RQ and  
129 do not use RQDM. If a compound has no effect on growth and viability in normoxia but is  
130 strongly lethal in our RQDM assay, this is a potential specific inhibitor of RQ synthesis or RQDM.  
131 Our goal here is to identify such compounds and characterise their effects on RQDM — they are

132 candidates as anthelmintics that act via inhibition of the anaerobic RQDM that allows STHs to  
133 survive in the host gut.

134  
135 We screened a library of 480 natural products and their derivatives from the Riken Natural  
136 Product Depository (RIKEN NPDepo)<sup>12,13</sup> in our KCN-based assay for RQDM and also in a more  
137 traditional *C. elegans* normoxic growth and viability assay. 80 of these natural products  
138 (authentic library) were known molecules with previously characterized biological activities.  
139 The remaining 400 compounds (pilot library) are a subset of a larger library of 25,000 diverse  
140 natural product derivatives (NPDs) — each compound represents a family of structurally related  
141 NPDs. This allows a rapid initial primary screen covering the broad structural space of the entire  
142 NP collection and, once hits are identified, structurally related NPDs are then screened in  
143 secondary assays. This both helps define the structural requirements for the biological effects  
144 of the primary hits as well as identifying any related compounds with greater potency. The  
145 overall results are shown in Fig2c. For both assays, each compound was screened in triplicate at  
146 50  $\mu$ M and the mean value was expressed as a modified z-score. Compounds with modified z-  
147 scores < -3 (i.e. < 3X median absolute deviation (MAD) ) were identified as hits; all data are  
148 shown in Supp Table 1.

149  
150 We identified 9 compounds that affect normoxic growth. Five of these were natural products  
151 with known activities and included nocodazole, an inhibitor of microtubule polymerisation<sup>30</sup>;  
152 staurosporine, a broad-spectrum kinase inhibitor<sup>31</sup>; camptothecin, a DNA topoisomerase  
153 inhibitor<sup>32</sup>; reveromycin A, an isoleucyl-tRNA synthetase inhibitor<sup>33</sup>; and aristolochic acid, a  
154 known mutagen<sup>34</sup>. These drugs all target core essential cellular components and the observed  
155 lethality is consistent with this. We note these are all known to have toxic effects on  
156 mammalian cells and thus are not suitable as anthelmintics. In addition to the hits with known  
157 bioactivities, we identified four compounds with novel scaffolds that inhibited *C. elegans*  
158 growth and viability. Several of these compounds show no activity in HEK293 cells but readily  
159 kill *C. elegans*. Future work will involve screening related NPDs to further explore the utility of  
160 these compounds as potential anthelmintics. For the purposes of this study, we focused on the  
161 8 compounds that showed little effect on growth in normoxia but killed worms specifically  
162 when they were relying on RQDM for survival. These are candidate RQDM inhibitors and we  
163 refer to these as ‘RQDM hits’.

164  
165 **NPD screens reveal siccanin as a species-selective inhibitor of Succinate Dehydrogenase**  
166 The NP library contains two groups of compounds: the larger group (pilot library) is of NPDs  
167 with no previous reported bioactivity, and a second smaller group (authentic library) includes  
168 compounds that had previously been shown to be active in at least one previous screen. This  
169 latter group yielded two potent RQDM hits known to affect oxidative phosphorylation.  
170 Niclosamide is a salicylanilide anthelmintic used to treat tapeworm infections<sup>35</sup>. Niclosamide  
171 acts as an ionophore and exerts its lethal effects by collapsing mitochondrial membrane  
172 potential<sup>36</sup>. We had previously found that other salicylanilide anthelmintics such as closantel  
173 are powerful inhibitors of RQDM (data not shown) and thus this hit is expected.

174

175 The second hit, siccanin, is less well characterised but has been reported to target Complex II,  
176 succinate dehydrogenase, in a species selective manner<sup>37,38</sup>. Complex II is the principal exit  
177 point for electrons during RQDM<sup>6,8</sup> and we had previously shown that inhibition of Complex II  
178 can kill *C. elegans* when they rely on RQDM for energy generation. The species selectivity of  
179 siccanin of Complex II inhibition had previously been shown in fungi, bacteria, and mammals<sup>37</sup>,  
180 but there are no reports of its effectiveness in any helminth or nematode. We find that siccanin  
181 inhibits *C. elegans* Complex II and that this is highly species selective (Fig 3A). The IC<sub>50</sub> vs *C.*  
182 *elegans* Complex II is ~ 8 nM whereas IC<sub>50</sub> vs mouse Complex II is ~18 μM (Fig 3A) equating to  
183 >1000-fold difference. The potency of complex II inhibition by siccanin is equivalent to wact-11,  
184 a nematode-specific Complex II inhibitor structurally related to the anthelmintic fluopyram<sup>39,40</sup>.

185  
186 To test whether siccanin binds to a similar site on Complex II as wact-11, we tested whether  
187 point mutations in the quinone binding pocket that are known to prevent wact-11 binding<sup>39</sup>,  
188 and thus cause resistance to wact-11, also affect siccanin inhibition. We found that the RP2749  
189 strain that has a single mutation in the quinone binding pocket of Complex II is insensitive to  
190 both wact-11 and siccanin (Fig 3b), confirming the binding site and direct mode of action of  
191 siccanin (Fig 3B-D). We note that the binding is subtly different for wact-11 and siccanin — for  
192 example, a T66I mutation in *sdhc-1*, a subunit of Complex II, causes resistance to wact-11 but  
193 not to siccanin (Fig 3C and 3D) and other mutations show similar effects (Fig 3E). This suggests  
194 that while they share a target, some mutations that could cause resistance to fluopyram/wact-  
195 11 analogues might not affect siccanin killing. However, we find that siccanin has lower species  
196 selectivity than wact-11, lower potency in growth assays and higher toxicity in mammalian cells  
197 (Fig 3F). It is thus unlikely to be an improvement on previously identified Complex II inhibitors  
198 as an anthelmintic. Nonetheless we were encouraged that the 2 RQDM hits in the characterised  
199 NPD set had clear roles in electron transport and mitochondrial function and turned our  
200 attention to the previously uncharacterised NP products.

201

## 202 **NPD screens identify a structurally related group of Complex I inhibitors.**

203 The NPD screens identified 7 primary hits as NPDs with no previously described bioactivity that  
204 were lethal to *C. elegans* when they rely on RQDM for energy generation. We retested all  
205 available derivatives in the whole NP library<sup>12,13</sup> of these 7 primary hits in the same RQDM assay  
206 and identified 7 clusters of structurally related hits (Fig4; all data in Supp Table 1). To begin to  
207 determine how each cluster might be affecting RQDM, we focused on testing whether they  
208 might affect the electron transport chain directly since we previously showed that Complex I  
209 inhibitors or Complex II inhibitors are potent blockers of RQDM<sup>11</sup>. Using established individual  
210 *in vitro* assays for each of the four core complexes of the ETC, we confirmed that purified *C.*  
211 *elegans* mitochondria are specifically affected by known inhibitors (e.g. rotenone only affects  
212 Complex I activity, KCN only affects Complex IV) as shown in Supp Fig 1. We then tested  
213 members of each of the 7 clusters for ability to inhibit each of the individual complexes (results  
214 in Table 1). Several of the NP clusters appear to affect more than one Complex — for example  
215 anacardic acid is a potent inhibitor of Complexes III and IV, and Cluster 6 affects I, III, and IV.  
216 Other clusters (e.g. Cluster 2 and 3) have no consistent effect on any specific complex  
217 suggesting they likely have a different mode of action. However, Cluster 4 showed highly  
218 specific inhibition of Complex I. Complex I is the sole entry point for electrons into the ETC

219 during RQDM and we previously showed that rotenone, a Complex I inhibitor, can block RQDM.  
220 We thus focused on characterising the compounds in Cluster 4.

221  
222 We had identified 4 potent inhibitors of RQDM in cluster 4, shown in Fig 5a. None of these had  
223 been previously characterised but a search for structurally-related commercial compounds  
224 identified papaverine as a close analogue. Papaverine is largely reported to be an inhibitor of  
225 phosphodiesterase<sup>41</sup> but there are 2 reports that it can also act as a Complex I inhibitor<sup>42,43</sup> and  
226 we confirm that it acts as a Complex I inhibitor in our hands on purified *C. elegans* mitochondria  
227 (Fig 5b). We next wanted to test whether any of the cluster 4 hits, or papaverine itself, showed  
228 any species selectivity — Complex I is critical for oxidative phosphorylation in the vertebrate  
229 hosts and thus we ideally want a compound that can selectively target the helminth Complex I.  
230 We found that neither papaverine nor three highly similar NP hits showed any significant  
231 species selectivity (Fig 5c and data not shown). However, NPD8790 showed good species  
232 selectivity, having >10-fold difference in IC<sub>50</sub> between *C. elegans* Complex I and either bovine  
233 or murine Complex I (Fig 5d). NPD8790 is structurally distinct from the other compounds in  
234 cluster 4 — instead of a quinoline or isoquinoline core, the core of NPD8790 is a benzimidazole.  
235 This is intriguing since benzimidazoles (BZs from here on) are extremely well characterised as  
236 anthelmintics and include the front line anthelmintics mebendazole, albendazole and related  
237 drugs<sup>19,20</sup>. The mode of action of known anthelmintic BZs is well established: they target beta-  
238 tubulins<sup>14,16,17,19</sup> and affect their ability to polymerise. We therefore wanted to examine  
239 whether known BZs also affect Complex I and whether NPD8790, the BZ that we identified as a  
240 Complex I inhibitor, also targets BEN-1.

241

#### 242 **Commercial benzimidazole anthelmintics do not target Complex I**

243 In *C. elegans*, the principal target of commercial anthelmintic BZ drugs is the beta-tubulin BEN-  
244 1<sup>14</sup>. However, we found that NPD8790 is a potent inhibitor of Complex I and thus we wanted to  
245 test whether commercial anthelmintic BZ drugs also affect Complex I activity. We find that  
246 none of the commercial BZs have any detectable effect on Complex I activity in purified  
247 mitochondria suggesting NPD8790 has a new activity for BZ compounds (Fig 6).

248 In *C. elegans*, mutation or deletion of BEN-1<sup>44,45</sup> results in resistance to commercial  
249 anthelmintic BZs. If NPD8790 also targets BEN-1, it should be similarly affected by BEN-1  
250 mutation or loss. We confirmed that in our hands, multiple commercially available BZ  
251 anthelmintics potently kill *C. elegans* in normoxia (Fig 7A and Supp Fig 2) and that either  
252 deletion of *ben-1* or any of the *ben-1* mutations known to cause BZ resistance in parasites<sup>16,17</sup>  
253 greatly reduce sensitivity as expected (Fig 7A). However, NPD8790 has very little effect on *C.*  
254 *elegans* normoxic growth until at very high concentrations and the small effect on growth is  
255 unaffected by *ben-1* mutation suggesting it may be acting in a different manner (Fig 7C). We  
256 also find that commercial BZ anthelmintics have little effect in our RQDM assay (Fig 7B and  
257 Supp Fig 2) and that the inhibition of RQDM by NPD8790 is not affected by mutations in *ben-1*  
258 (Fig 7D). Finally, we purified mitochondria from several *C. elegans* strains carrying *ben-1*  
259 mutations and tested whether NPD8790 could still affect Complex I activity. We find that  
260 mutations in *ben-1* have no effect on the ability of NPD8790 to inhibit Complex I (Fig 7E). We  
261 thus conclude that NPD8790 is a BZ compound that has a distinct mode of action to all available

262 BZ anthelmintics — while they target BEN-1 and not Complex I, NPD8790 targets Complex I and  
263 not BEN-1.

264

### 265 **Structure-function analysis identifies requirements for Complex I inhibition by NPD8790 BZ** 266 **compounds**

267 The sole BZ compound that we identified as a Complex I inhibitor in our NPD screens was  
268 NPD8790. To explore how it targets Complex I and to test whether we could identify related  
269 compounds with either higher potency or higher species selectivity, we screened 1286  
270 structurally related BZ compounds. We first assayed each compound in our RQDM assay at  
271 50 $\mu$ M to narrow down BZ compounds that potentially shared similar bioactivity with NPD8790.  
272 A total of 88 BZ compounds (6.8%) reduced motility by at least 75% in our RQDM assay, 64 of  
273 these compounds that were available were then reordered to perform more comprehensive  
274 dose responses. Each of the 64 compounds were assayed for their effect on Complex I activity  
275 in both *C. elegans* and bovine mitochondria, as well as their ability to affect *C. elegans* growth.  
276 Finally, we also assayed toxicity in HEK293 cells. These data are all shown in Supp table 2.

277

278 We identified 3 distinct structural classes of BZ compounds that are Complex I inhibitors that  
279 block RQDM in our assays and that show potential as anthelmintics — we will refer to these as  
280 classes A-C (Fig 8). All of them have a BZ core which is linked to an aromatic ring. The key  
281 differences between the subclasses is the position and the length of the linkage.

282 Class A compounds include NPD8790 and in all of these the aromatic ring is linked via position 2  
283 of the BZ group via a short linkage (1-atom linkage). These compounds are good Complex I  
284 inhibitors with IC50s well below 10  $\mu$ M. More importantly, Class A includes the compounds  
285 with the strongest species selectivity e.g. NPD8790 has a >10-fold differences in IC50 between  
286 *C. elegans* and bovine Complex I. They have very little detectable effect on growth in normoxic  
287 conditions and NPD8790 also has no observable toxicity in mammalian cells even at high  
288 concentrations (>50  $\mu$ M). These are thus good candidates as anthelmintics.

289

290 The other two classes both contain multiple compounds with substantially more potent  
291 Complex I inhibition than Class A e.g. Chembridge ID# 5567167 has a 75-fold lower IC50 for *C.*  
292 *elegans* Complex I than NPD8790. These compounds all have the aromatic rings linked through  
293 the 1st position of the BZ core with linkages of varying lengths — the differences between the  
294 two classes is in the length of the linkage between the aromatic group and the BZ core. Class B  
295 comprises compounds with a 1-atom linkage — these are very potent inhibitors with  
296 reasonable species selectivity. Compounds with 2-atom linkages are substantially less potent,  
297 but potency appears to improve with longer linkages. 5-linkage compounds show excellent  
298 potency with good species selectivity, and these make up Class C of our potential anthelmintics.  
299 We note that Class B and C compounds are good anthelmintic candidates but that both sets  
300 show effects on growth in normoxia unlike Class A compounds, they also show a slightly  
301 reduced species selectivity. Consistent with their effect as Complex I inhibitors, we find that  
302 treatment of wild-type worms with the Class B and C BZ compounds causes a rapid decrease in  
303 ATP levels (Supp Fig 3) and a rapid drop in mitochondrial potential. This effect on ATP levels in  
304 normoxia is also seen for Class A compounds but at much higher concentrations. This underlies  
305 that one of the major differences between Class A and Class B/C is the effect in normoxia. This

306 suggests that Class A compounds may selectively effect worms when they rely on RQDM,  
307 making them good candidates for anthelmintics.

308  
309

## 310 Discussion

311 Soil-transmitted helminths (STHs) are major human pathogens. While there are excellent  
312 frontline anthelmintics including macrocyclic lactones and benzimidazoles, the number of  
313 classes of anthelmintics is very limited and resistance is increasing and is already very high for  
314 some livestock parasites. There is thus an urgent need for new classes of anthelmintic drugs. In  
315 this study we focused on using *C. elegans* to screen for drugs that specifically inhibit the  
316 unusual anaerobic metabolism that STHs like *Ascaris* and hookworm use to survive the low  
317 oxygen conditions in the host gut. This metabolism requires rhodoquinone (RQ), an electron  
318 carrier that is absent from the hosts. We screened a library of natural products and their  
319 derivatives (NPDs) that contained both previously characterised and uncharacterised  
320 compounds and identified multiple distinct structural families of compounds that kill *C. elegans*  
321 specifically when they are surviving using RQDM — we term these ‘RQDM hits’. These are  
322 candidate anthelmintics since they may similarly kill STHs in vivo when they rely on RQDM for  
323 survival in the gut.

324

325 We assessed whether the RQDM hits target specific complexes of the ETC. During RQDM,  
326 electrons enter the ETC solely through Complex I and exit through Complex II and consistent  
327 with this we had previously shown that known Complex I inhibitors and Complex II inhibitors  
328 are potent inhibitors of RQDM. We identify both specific Complex I and Complex II inhibitors in  
329 our screens — a novel set of benzimidazole compounds as Complex I inhibitors and Siccanin as  
330 a Complex II inhibitor. The way these two sets of compounds affect RQDM is consistent with  
331 our previous findings as these are expected to block electron entry or exit from the ETC. Other  
332 RQDM hits are more enigmatic however. For example, anacardic acid is a potent inhibitor of  
333 Complex III and IV in purified mitochondria and it is unclear mechanistically how it might be  
334 acting or why it has such a strong effect on RQDM but appears to have no detectable effect on  
335 metabolism in normoxia. Other RQDM hits appear to have no effect on the ETC and must be  
336 affecting RQDM in some other unknown manner, perhaps through targeting other required  
337 components of RQDM such as AMPK<sup>46</sup> or on RQ synthesis itself. Thus while the mode of action  
338 of some of the RQDM hits fits with what is known of electron flow in the ETC in RQDM, others  
339 will require future studies to identify the targets and mode of action.

340

341 The main focus of our analysis was on a novel family of benzimidazole (BZ) compounds that we  
342 identified as potent and specific Complex I inhibitors. We showed that the effect of these new  
343 BZ compounds is not altered by mutations in *ben-1*, the beta tubulin target of well-  
344 characterised commercial benzimidazoles, and that commercial benzimidazoles do not affect  
345 Complex I activity confirming that the inhibition of Complex I by this new family of BZ  
346 compounds is a novel activity.

347

348 The critical difference between the new BZs we identified as RQDM hits and BEN-1-targeting  
349 commercial BZ drugs is the linkage of a benzene ring to the benzimidazole ring in the new



350 Complex I inhibiting BZ compounds. The linkage length and precise position of the linkage on  
351 the benzimidazole ring affects potency and specificity in complex ways. We find that the most  
352 potent Complex I inhibitors have the benzene ring attached to the 1-position of the  
353 benzimidazole ring with a 1-atom linkage (Class B) — the most potent such compounds have  
354 ~100nM IC50s for Complex I. However, they affect both bovine and *C. elegans* Complex I with  
355 similar IC50s, suggesting that they are not ideal as anthelmintics. Compounds with the same 1-  
356 atom linkage between the benzimidazole and benzene group but linked to the 2-position of the  
357 benzimidazole ring show slightly reduced inhibition of Complex I but increased species  
358 selectivity and essentially no detectable effect on growth in normoxia when the worms are  
359 using Complex I coupled to ubiquinone. The difference in the effect of these compounds on  
360 ubiquinone-coupled electron transport in normoxia and on RQ-coupled electron transport in  
361 KCN conditions is marked — for example NPD8790 has no effect on growth in normoxia at 1  
362 mM but has an LD50 in our RQDM assay of ~14  $\mu$ M. We speculate that this may reflect a  
363 difference in ability to block docking of UQ and RQ to Complex I and that this may also underlie  
364 the species selectivity we observe. This set of compounds where the aromatic group is linked  
365 via a 1-atom linkage on the 2 position of the benzimidazole ring (Class A) appear like much  
366 better candidates as anthelmintics given their higher species selectivity, and the absence of any  
367 detectable effect on normoxic growth. These are our leading candidates as anthelmintics.

368  
369 We also note that lengthening the linkage between the BZ core and the benzene ring has  
370 complex effects. Increasing from a 1-atom to a 2-atom linkage length greatly reduces the ability  
371 of the compounds to inhibit Complex I. For example, while compounds with the benzene group  
372 linked to the 1st position of the benzimidazole ring with a 1 atom linker (Class B) have IC50s in  
373 the sub micromolar range, this increases to >50 $\mu$ M when the linkage is a 2-atom linkage.  
374 Intriguingly, this dramatic drop in potency is highest for 2-atom linkages — 3- and 4-atom  
375 linkages to the same benzimidazole position have low  $\mu$ M IC50s for Complex I and finally  
376 compounds with 5-atom linkages (Class C) typically show excellent potency with IC50s in the  
377 sub micromolar range like those with a 1-atom linkage (Class B). This high potency with either a  
378 1 or 5-atom linkage and reduced potency with 2-4 atom linkages is intriguing. We suggest that  
379 the 1-atom and 5-atom linkage compounds are interacting with the active site in distinct ways  
380 and speculate that this may reflect the complexity of the way that Complex I interacts with  
381 quinones through its multiple Fe-S centres. Finally, we note that there is a single previous  
382 report of an insecticide with a benzimidazole core with activity as a Complex I inhibitor<sup>47</sup>.  
383 However, the structure is distinct to the hits we have identified here — instead of an aromatic  
384 group linked to the BZ core, it has a long terpenoid chain. Additionally, no species selectivity has  
385 yet to be demonstrated for this compound.

386  
387 In summary, we screened a natural product library in *C. elegans* to identify compounds that  
388 killed *C. elegans* only under conditions when they require RQDM to survive. We believe that  
389 this is a reasonable model for helminths which rely on RQDM to survive in the highly anaerobic  
390 environment of a host gut. We identified compounds that specifically inhibit either Complex I or  
391 Complex II in a species-specific manner. Complex I and II are the entry and exit points for  
392 electrons in the RQ-coupled ETC and thus the mode of action is consistent with what is known  
393 of the ETC in RQDM. The Complex I inhibitors are a family of compounds with a benzimidazole

394 core and thus is a novel activity for benzimidazoles — well characterised benzimidazole  
395 anthelmintics have no activity against Complex I and target microtubules. We thus believe that  
396 we have a new class of compounds as potential anthelmintics that act by specifically targeting  
397 the unusual anaerobic metabolism of this major class of animal and human pathogens.

398  
399 **Acknowledgements** This research was funded by grants 501584 and 5003009 to Andrew Fraser  
400 from the Canadian Institute of Health Research. We thank Prof Peter Roy and Prof Erik  
401 Andersen for sharing worm strains; Prof Derek van der Kooy, Brenda Takabe and Daniel Merritt  
402 for mouse organs and use of their Dounce homogenizer; and the Peel Sausage company for the  
403 beef heart. We also thank Jason Moffat's group for letting us use their plate reader. Finally, we  
404 thank Andrew Burns and Sam Del Borrello for guidance and helpful discussion throughout.  
405

## 406 **Materials and Methods**

407

### 408 **Chemical Sources**

409 The Authentic and Pilot libraries of natural products as well as related derivatives used in our  
410 preliminary screens were provided by the RIKEN Natural Product Depository (NPDepo). Hit  
411 compounds identified were purchased from Vitas-M for retesting. Benzimidazole analogs of  
412 NPD8790 were purchased from ChemBridge Corporation, Vitas-M and Enamine. Wact-11 (ID #  
413 6222549) was purchased from ChemBridge Corporation. Rotenone, antimycin A, potassium  
414 cyanide, albendazole, mebendazole, thiabendazole, fenbendazole were purchased from  
415 MilliporeSigma. Siccanin was purchased from Cayman chemical.

416

### 417 **C. elegans strains and maintenance**

418 All animals were cultured using standard methods at 20°C on NGM (nematode growth medium)  
419 agar plates seeded with *E. coli* OP50 as previously described (Stiernagle, 2006)<sup>48</sup>. In addition to  
420 the traditional laboratory strain N2, this work includes the following strains: CB1003 (*kynu-*  
421 *1(e1003)*), RP2639 (*sdhc-1(tr359)*), RP2702 (*sdhc-1(tr410)*), RP2748 (*sdhc-1(tr4230)*), RP2749  
422 (*sdhc-1(tr424)*), RP2776 (*sdhb-1(tr438)*), CB3474 (*ben-1(e1880)*), ECA882 (*ben-1(ean64)*),  
423 ECA917 (*ben-1(ean98)*), ECA1075 (*ben-1(ean143)*), ECA1080 (*ben-1(ean148)*), and PE255 (*fels5*  
424 [*sur-5p::luciferase::GFP + rol-6(su1006)*] X). The five *sdhc-1* and *sdhb-1* strains were generously  
425 provided by Dr. Peter Roy, five *ben-1* strains (ECA prefix) were generously provided by Dr. Erik  
426 Andersen, and all other strains were provided by the *Caenorhabditis* Genetics Centre (CGC,  
427 University of Minnesota).

428

### 429 **Image-based chemical screens in C. elegans**

430 The rodoquinone-dependent metabolism (RQDM) assays were performed as described  
431 previously (Del Borrello *et al.*, 2019) using an image-based system for measuring worm motility  
432 that was developed in lab (Spensley *et al.*, 2018)<sup>49</sup>. Briefly, 25  $\mu$ L of M9 buffer was distributed  
433 to each well of a flat-bottomed 96-well culture plate, and chemicals were added using a pinning  
434 tool with a 500 nL slot volume (V&P Scientific). First larval-stage (L1) worms were isolated from  
435 mixed-stage plates using 96-well 11  $\mu$ m nylon mesh filter plates (Millipore Multiscreen) and  
436 diluted in M9 to a concentration of  $\sim$ 6 worms/ $\mu$ L. 20  $\mu$ L of worm suspension containing  
437 approximately 120 animals was then added to each well. Stock solutions of potassium cyanide  
438 (KCN) were prepared fresh in phosphate buffered saline (PBS) before each experiment and  
439 diluted to a 10X working concentration (2mM) in M9 buffer. 5  $\mu$ L of 10X KCN solution was  
440 added to each well to reach a final concentration of 200  $\mu$ M KCN. Immediately following the  
441 addition of KCN, plates were sealed with aluminum sealing tape to prevent evaporation and  
442 were incubated for 15 hours at 20°C with shaking at 165 rpm. Following 15 hours of incubation,  
443 KCN in wells was diluted 6-fold with M9 buffer and plates were placed on a Nikon Ti Eclipse  
444 inverted microscope to be monitored every 10 minutes for 3 hours. For each timepoint, two  
445 images of every well were captured at an interval of 500 ms and processed with custom Python  
446 scripts to isolate worm-associated pixels from background. An aggregate score of raw worm  
447 motility was determined for each well by comparing the change in worm-associated pixels  
448 between the two images (i.e., worm movement between two frames) to the sum of all worm-  
449 associated pixels (i.e., number of worms in frame). The raw motility score for each well was

450 divided by the raw motility scores for the corresponding dimethyl sulfoxide (DMSO) controls,  
451 resulting in a “Relative motility” value for each chemical. For chemical screens, the relative  
452 motility of each well after 3 hours of KCN dilution was used as an endpoint.

453  
454 The *C. elegans* liquid growth and viability assays were adapted from a previously established  
455 chemical screening protocol (Burns *et al.*, 2015)<sup>39</sup>. In short, a saturated culture of HB101 *E. coli*  
456 was concentrated 2-fold in liquid NGM and 40  $\mu\text{L}$  of this suspension was dispensed to each well  
457 of a flat-bottomed 96-well culture plate. Chemicals from each library were added using a  
458 pinning tool with a 500 nL slot volume (V&P Scientific). L1 worms were synchronized from an  
459 embryo preparation (Burns *et al.*, 2006)<sup>40</sup> performed the day prior and diluted to a  
460 concentration of  $\sim 2$  worms/ $\mu\text{L}$  in M9 buffer. 10  $\mu\text{L}$  of worm suspension containing  
461 approximately 20 animals was then added to each well. Culture plates were sealed with  
462 parafilm and placed in a plastic container lined with wet paper towel to prevent evaporation.  
463 Containers were then transferred to incubators for 6 days at 20°C with shaking at 165 rpm.  
464 Following incubation, culture plates were removed, and wells were diluted 7-fold with M9 to  
465 decrease the turbidity of the HB101-NGM suspension. 1-2 minutes post-dilution, culture plates  
466 were placed on a Nikon Ti Eclipse inverted microscope and single images were taken of each  
467 well. Images were processed using custom Python scripts to isolate worm associated pixels  
468 from background. An overview of the image processing steps has been previously described  
469 (Spensley *et al.*, 2018)<sup>49</sup>. Raw scores of overall worm growth and viability were determined as  
470 the sum of worm-associated pixels for each well. The raw growth/viability score for each well  
471 was divided by the raw grow/viability scores for the corresponding DMSO controls, resulting in a  
472 “Relative growth” value for each chemical.

473  
474 NP libraries were stored in 96-well plates, each containing 80 compounds and 16 DMSO  
475 controls (columns 1 and 12). For our preliminary screens of NP libraries, six 96-well plates  
476 containing 480 compounds and 96 DMSO controls were screened in triplicate at a  
477 concentration of 50  $\mu\text{M}$  for both *C. elegans* assays; data is displayed as the average of the three  
478 biological replicates. The final concentration of DMSO in wells was kept to 1% v/v to prevent  
479 any confounding effects of drug solvent on worm motility or viability. To account for possible  
480 variation among plates, the process of hit identification was performed on a plate-to-plate  
481 basis. As drug hits (i.e., outliers) can influence the mean of the distribution of scores, relative  
482 motility or relative growth values were converted to robust z-scores (r.z-score) using the  
483 median and the median absolute deviation (MAD) of each plate. Hits were identified if a  
484 compound’s r.z score fell below -3 (i.e., 3x MAD below the median) in either of the respective  
485 assays.

486  
487 Each of these assays was used for additional follow-up dose-response or time course  
488 experiments in this work. These experiments were carried out with at least three or more  
489 biological replicates. For dose-response experiments, dose response curves were fitted using  
490 non-linear regression in the Python library Scipy. LC50 and EC50 values were obtained from the  
491 fitted curves.

492  
493

#### 494 **HEK293 cell culture and dose-response experiments**

495 Human embryonic kidney (HEK293; Invitrogen's Flp-In-293 cell line cat #R75007) cells were  
496 grown and maintained in Dulbecco's Modified Eagle's Medium (DMEM) containing 10% fetal  
497 bovine serum (FBS) and 1% penicillin-streptomycin (PS). To prepare cells for viability testing,  
498 5000 HEK293 cells/100  $\mu$ L were seeded into each well of a 96-well flat-bottom tissue culture  
499 plate and grown overnight at 37°C with 5% CO<sub>2</sub>. 0.5  $\mu$ L of compound from prepared dose-  
500 response plates were then added to each well (0.5% v/v DMSO) and cells were allowed to grow  
501 for an additional 2 days. After this period of growth, cells were incubated for 4 hours with 10  $\mu$ L  
502 of CellTiter-Blue viability reagent. Raw scores of cell viability were then determined using a  
503 CLARIOstar Plate Reader (560/590nm) and the fluorometric quantification of the reduction of  
504 resazurin to resorufin. "Relative viability" was determined by dividing the background-  
505 corrected scores of chemical-treated wells from the corresponding DMSO controls. Data  
506 represents the average of three biological replicates.

507

#### 508 **Cheminformatics**

509 Clusters of natural products and derivatives related to each of the initial hits identified in our  
510 chemical screen were curated by the RIKEN natural product depository. Chemical structures of  
511 these compounds were analyzed in DataWarrior (Sander *et al.*, 2015)<sup>50</sup>. Chemical similarity  
512 among compounds of the same cluster was determined by identifying compounds with a  
513 shared core scaffold. Murcko scaffolds (for compounds with ring systems > 1) were first  
514 identified for each molecule using DataWarrior. FP2 fingerprints were then generated for each  
515 scaffold using Pybel (O'Boyle *et al.*, 2008)<sup>51</sup> and pairwise tanimoto coefficients between  
516 fingerprints were used to assess chemical similarity. Scaffolds that shared a tanimoto  
517 coefficient of 0.55 or greater were grouped together. Network visualization of similar scaffolds  
518 in each cluster of natural products in our screen are shown using Cytoscape (Cline *et al.*,  
519 2007)<sup>52</sup>.

520

#### 521 **Mitochondria isolation from *C. elegans***

522 Mitochondria were isolated from adult *C. elegans* for each of the following strains: N2, RP2749,  
523 CB3474, ECA882, ECA917, ECA1075, and ECA1080. To obtain mitochondria in sufficient  
524 quantities, worms were grown in bulk through liquid culture. The isolation of mitochondria  
525 followed the protocol previously outlined in Burns *et al.*, 2015. The procedure was repeated for  
526 each of the respective strains.

527

#### 528 **Mitochondria isolation from mammalian tissue**

529 Six 8–10-week-old C57Bl/6 female mice (Charles River) were freshly dissected, and their livers  
530 and hearts collected into separate 1.5 mL microcentrifuge tubes. Organs were flash-frozen in  
531 liquid nitrogen and stored at -80°C prior to use. The heart of a freshly slaughtered adult cow  
532 was obtained from a local abattoir (Peel Sausage Inc), chopped into ~1-inch cubes and collected  
533 into 50 mL falcon tubes. Falcon tubes were flash frozen on location in a container of dry ice and  
534 later transferred to storage at -80°C to await mitochondria isolation. Isolation of mitochondria  
535 from all mammalian tissue was carried out following the protocol previously described in Burns  
536 *et al.*, 2015. However, due to size, the initial homogenization of cow heart tissue was  
537 performed with several 5 s pulses in small Nutribullet blender rather than using a Dounce

538 homogenizer. All mouse protocols were reviewed and approved by the University of Toronto  
539 Animal Care Committee, in accordance with the Canadian Council on Animal Care.

540

#### 541 **Electron Transport Chain (ETC) Assays**

542 The enzymatic activities of individual ETC complexes were determined spectrophotometrically  
543 in isolated mitochondria using a Varioskan LUX Multimode plate reader (ThermoFisher  
544 Scientific). Mitochondrial pellets previously isolated were thawed on ice and resuspended in  
545 ice-cold isolation buffer (250 mM sucrose, 10 mM Tris (pH 7.5), 1 mM EDTA). The BCA assay  
546 (Walker, 1994) was used to quantify the protein concentration of mitochondria suspensions.  
547 Solutions were diluted to a concentration of 0.2 mg ml<sup>-1</sup> for use in all assays. For use in the  
548 complex I assay, mitochondria pellets were freeze-thawed three times to increase accessibility  
549 to enzyme.

550

551 Rotenone-sensitive complex I (NADH: Decylubiquinone Oxidoreductase) activity was assessed  
552 using the 2,6-dichlorophenolindophenol (DCIP)-coupled method previously optimized in Long *et*  
553 *al.*, 2008<sup>53</sup>. Assays were setup in 96-well flat bottom culture plates, with each well containing  
554 100 μM of chemical dissolved in 180 μL of complex I assay buffer (25 mM KPi buffer (pH 7.5), 3  
555 mg mL<sup>-1</sup> bovine serum albumin (BSA), 80 μM NADH, 60 μM decylubiquinone, 160 μM DCIP, 2  
556 μM antimycin A and 2 mM KCN). DMSO (2.4% v/v) and rotenone (10 μM) controls were  
557 included in parallel to account for confounding effects of the solvent and determine the  
558 contribution of any rotenone-insensitive activity. The reaction was initiated by pipetting 20 μL  
559 mitochondria suspension into each well and briefly mixing. Absorbance was measured at 600  
560 nm in 30 s intervals over the course of 15 minutes. Total complex I enzymatic activity was  
561 determined by plotting absorbance versus time for each well and calculating the slope of the  
562 line during the linear phase of the initial rate of reaction (minutes 1-4). Rotenone-sensitive  
563 activity was calculated by subtracting the complex I activity of the rotenone control wells.  
564 Percent complex I activity for each chemical was then calculated by dividing the rotenone-  
565 sensitive activity of chemical-treated wells by that of the DMSO control wells.

566

567 Complex II (Succinate Dehydrogenase) activity was assessed using the DCIP-coupled method  
568 previously described in Burns *et al.*, 2015<sup>39</sup>. Assays were similarly setup in 96-well culture  
569 plates, with each well containing 100 μM of chemical dissolved in 150 μL of complex II assay  
570 buffer (1X PBS, 0.35% BSA, 20 mM succinate, 240 μM KCN, 60 μM DCIP, 70 μM  
571 decylubiquinone, 25 μM antimycin A, 2 μM rotenone). DMSO, water and malonate (100 mM)  
572 controls were included in parallel. The reaction was initiated by pipetting 5 μL of mitochondria  
573 suspension into each well and briefly mixing. Absorbance was measured at 600 nm in 30 s  
574 intervals over the course of 15 minutes. Complex II enzymatic activity was determined by  
575 plotting absorbance versus time for each well and calculating the slope of the line during the  
576 linear phase of the initial rate of reaction (minutes 1-7). Percent complex II activity for each  
577 chemical was calculated by dividing the activity of chemical-treated wells by that of the DMSO  
578 controls.

579

580 Antimycin A-sensitive Complex III (Decylubiquinol-Cytochrome C Reductase) activity was  
581 determined by measuring the reduction of cytochrome C (CytC) in a protocol optimized in Luo

582 *et al.*, 2008<sup>54</sup>. Decylubiquinol for complex III assays was prepared fresh as described in Janssen  
583 and Boyle, 2019<sup>55</sup>. In short, a few flakes of potassium borohydride were mixed into 10 mM  
584 decylubiquinone dissolved in ethanol, 0.1 M HCl was then added in 5  $\mu$ L increments until the  
585 solution turned colourless. The solution was spun down at 10,000 xg for 1 minute to pellet  
586 potassium borohydride, and decylubiquinol was transferred to a fresh tube. Assays were setup  
587 in 96-well format with each well containing 100  $\mu$ M of chemical dissolved in 180  $\mu$ L of complex  
588 III assay buffer (50 mM Tris-HCl (pH 7.5), 4 mM NaN<sub>3</sub>, 50  $\mu$ M decylubiquinol, 50  $\mu$ M oxidized  
589 CytC, 0.01% BSA, 0.05% Tween-20). DMSO, ethanol and antimycin A (100 mM) controls were  
590 included in parallel. The reaction was initiated by pipetting 20  $\mu$ L of mitochondria suspension  
591 into each well and briefly mixing. Absorbance was measured at 550 nm in 30 s intervals over  
592 the course of 15 minutes. Total complex III enzymatic activity was determined by plotting  
593 absorbance versus time for each well and calculating the slope of the line during the linear  
594 phase of the initial rate of reaction (minutes 1-4). Antimycin-sensitive activity was calculated by  
595 subtracting the complex III activity of the antimycin control wells. Percent complex III activity  
596 for each chemical was then calculated by dividing the antimycin-sensitive activity of chemical-  
597 treated wells by that of the DMSO control wells.

598  
599 Complex IV (Cytochrome C Oxidase) activity was determined by following the oxidation of CytC  
600 in the protocol outlined by Janssen and Boyle, 2019<sup>55</sup>. Reduced CytC was prepared fresh by  
601 adding 1  $\mu$ L increments of 0.1 M dithiothreitol to a 1 mM solution of CytC and vortexing. The  
602 solution changes colour from brown to orange/pink when CytC has been reduced. Reduction of  
603 CytC was checked by diluting a sample 50-fold and measuring the ratio of absorbance 550/560  
604 nm (ratio > 6 indicates reduction). To setup the assay, 180  $\mu$ L of complex IV buffer (50 mM KPi  
605 buffer, 60  $\mu$ M reduced CytC) containing a dissolved hit compound at 100  $\mu$ M was added to each  
606 well of a 96-well plate. DMSO and KCN (300  $\mu$ M) controls were included in parallel. The  
607 reaction was initiated by pipetting 20  $\mu$ L of mitochondria suspension into each well and briefly  
608 mixing. Absorbance was measured at 550 nm in 30 s intervals over the course of 15 minutes.  
609 Complex IV enzymatic activity was determined by plotting absorbance versus time for each well  
610 and calculating the slope of the line during the linear phase of the initial rate of reaction  
611 (minutes 1-3). Percent complex IV activity for each chemical was calculated by dividing the  
612 activity of chemical-treated wells by that of the DMSO controls.

613  
614 For preliminary screens of hit compounds, data is the average of four biological  
615 replicates, each with two technical replicates. The complex I and II activity assays were also  
616 used for all follow-up dose-response experiments presented in this work. Assays were  
617 performed to cover range of final concentrations of chemical from 0.1 nM to 75  $\mu$ M. For dose-  
618 responses of benzimidazole analogs, data represents the average of two biological replicates,  
619 each with two technical replicates. For all other dose-responses, data represents the average of  
620 four biological replicates, each with two technical replicates.

### 621 622 ***C. elegans in vivo* ATP levels**

623 *In vivo* energy levels of *C. elegans* were estimated using a bioluminescent strain (PE255)  
624 constitutively and ubiquitously expressing firefly luciferase as previously reported (Lagido *et al.*,  
625 2008; Luz *et al.*, 2016)<sup>56,57</sup>. 30  $\mu$ L of M9 buffer was distributed to each well of a black flat-

626 bottomed 96-well culture plate, and 0.5  $\mu\text{L}$  of chemicals or DMSO (1% v/v) controls were added  
627 to the wells with a multi-channel pipette. L1 synchronized worms obtained from an embryo  
628 preparation were plated on NGM agar seeded with OP50 *E. coli* and allowed to grow for 12  
629 hours at 20 °C. After allowing time for foraging, worms were washed off of plates, rinsed twice  
630 in M9 buffer and diluted to a concentration of  $\sim 10$  worms/ $\mu\text{L}$ . 20  $\mu\text{L}$  of worm suspension  
631 containing  $\sim 200$  animals was then added to the microplate wells. Plates were sealed with an  
632 aluminum foil seal and transferred to an incubator for 6 hours at 20 °C with shaking at 165 rpm.  
633 Following incubation, 100  $\mu\text{L}$  of luminescence buffer (10 mM  $\text{Na}_2\text{PO}_4$ , 5 mM Citric acid, 0.5%  
634 DMSO, 0.025% Triton X-100, 50  $\mu\text{M}$  Luciferin) was added to each well of the microplate and  
635 mixed via 180 rpm shaking for 2.5 minutes. Luminescence was then measured on a CLARIOstar  
636 (BMG Labtech) plate reader. Percent ATP for each dose of chemical was calculated by dividing  
637 the background corrected luminescence by that of the corresponding DMSO controls. Data  
638 represents the average of four biological replicates, each with four technical replicates.  
639  
640



641 **REFERENCES**

- 642 1. Torgerson, P. R. *et al.* World Health Organization Estimates of the Global and Regional  
643 Disease Burden of 11 Foodborne Parasitic Diseases, 2010: A Data Synthesis. *PLoS Med* **12**,  
644 e1001920 (2015).
- 645 2. Pullan, R. L., Smith, J. L., Jasrasaria, R. & Brooker, S. J. Global numbers of infection and  
646 disease burden of soil transmitted helminth infections in 2010. *Parasit. Vectors* **7**, 37 (2014).
- 647 3. Geerts, S. & Gryseels, B. Anthelmintic resistance in human helminths: a review. *Trop. Med.*  
648 *Int. Health* **6**, 915–921 (2001).
- 649 4. Berry, B. J., Baldzizhar, A., Nieves, T. O. & Wojtovich, A. P. Neuronal AMPK coordinates  
650 mitochondrial energy sensing and hypoxia resistance in *C. elegans*. *FASEB J.* **34**, 16333–  
651 16347 (2020).
- 652 5. Wolstenholme, A. J., Fairweather, I., Prichard, R., Von Samson-Himmelstjerna, G. &  
653 Sangster, N. C. Drug resistance in veterinary helminths. *Trends Parasitol.* **20**, 469–476  
654 (2004).
- 655 6. Tielens, A. G. M. Energy generation in parasitic helminths. *Parasitol. Today* **10**, 346–352  
656 (1994).
- 657 7. Tielens, A. G. M. & Van Hellemond, J. J. The electron transport chain in anaerobically  
658 functioning eukaryotes. *Biochim. Biophys. Acta - Bioenerg.* **1365**, 71–78 (1998).
- 659 8. Kita, K. Electron-transfer complexes of mitochondria in *Ascaris suum*. *Parasitol. Today* **8**,  
660 155–159 (1992).
- 661 9. Kita, K., Nihei, C. & Tomitsuka, E. Parasite Mitochondria as Drug Target: Diversity and  
662 Dynamic Changes During the Life Cycle. *Curr. Med. Chem.* **10**, 2535–2548 (2003).

- 663 10. Allen, P. C. Helminths: Comparison of their rodoquinone. *Exp. Parasitol.* **34**, 211–219  
664 (1973).
- 665 11. Del Borrello, S. *et al.* Rodoquinone biosynthesis in *C. elegans* requires precursors  
666 generated by the kynurenine pathway. *eLife* **8**, 1–21 (2019).
- 667 12. Osada, H. & Nogawa, T. Systematic isolation of microbial metabolites for natural products  
668 depository (NPDepo). *Pure Appl. Chem.* **84**, 1407–1420 (2011).
- 669 13. Kato, N., Takahashi, S., Nogawa, T., Saito, T. & Osada, H. Construction of a microbial natural  
670 product library for chemical biology studies. *Curr. Opin. Chem. Biol.* **16**, 101–108 (2012).
- 671 14. Driscoll, M., Dean, E., Reilly, E., Bergholz, E. & Chalfie, M. Genetic and molecular analysis of  
672 a *Caenorhabditis elegans* beta-tubulin that conveys benzimidazole sensitivity. *J Cell Biol*  
673 **109**, 2993–3003 (1989).
- 674 15. Enos, A. & Coles, G. C. Effect of benzimidazole drugs on tubulin in benzimidazole resistant  
675 and susceptible strains of *Caenorhabditis elegans*. *Int. J. Parasitol.* **20**, 161–167 (1990).
- 676 16. Ghisi, M., Kaminsky, R. & Mäser, P. Phenotyping and genotyping of *Haemonchus contortus*  
677 isolates reveals a new putative candidate mutation for benzimidazole resistance in  
678 nematodes. *Vet. Parasitol.* **144**, 313–320 (2007).
- 679 17. Hahnel, S. R. *et al.* Extreme allelic heterogeneity at a *Caenorhabditis elegans* beta-tubulin  
680 locus explains natural resistance to benzimidazoles. *PLOS Pathog.* **14**, e1007226 (2018).
- 681 18. World Health Organization. *Prevention and control of schistosomiasis and soil-transmitted*  
682 *helminthiasis: report of a WHO expert committee.* (2002).
- 683 19. Lacey, E. Mode of action of benzimidazoles. *Parasitol. Today* **6**, 112–115 (1990).

- 684 20. Brown, H. D. *et al.* ANTIPARASITIC DRUGS. IV. 2-(4'-THIAZOLYL)-BENZIMIDAZOLE, A NEW  
685 ANTHELMINTIC. *J. Am. Chem. Soc.* **83**, 1764–1765 (1961).
- 686 21. Campbell, W. C., Fisher, M. H., Stapley, E. O., Albers-Schönberg, G. & Jacob, T. A.  
687 Ivermectin: a potent new antiparasitic agent. *Science* **221**, 823–828 (1983).
- 688 22. Campbell, W. C. History of avermectin and ivermectin, with notes on the history of other  
689 macrocyclic lactone antiparasitic agents. *Curr. Pharm. Biotechnol.* **13**, 853–865 (2012).
- 690 23. Kita, K. [Current Trend of Drug Development for Neglected Tropical Diseases (NTDs)].  
691 *Yakugaku Zasshi* **136**, 205–11 (2016).
- 692 24. Moore, H. W. & Folkers, K. Coenzyme Q. LXII. Structure and Synthesis of Rhodoquinone, a  
693 Natural Aminoquinone of the Coenzyme Q Group. *J. Am. Chem. Soc.* **87**, 1409–1410 (1965).
- 694 25. OZAWA, H., SATO, M., NATORI, S. & OGAWA, H. Rhodoquinone-9 from the Muscle of  
695 *Ascaris lumbricoides* var. *suis*. *Chem. Pharm. Bull. (Tokyo)* **18**, 1099–1103 (1970).
- 696 26. Sato, M. & Ozawa, H. Occurrence of ubiquinone and rhodoquinone in parasitic nematodes,  
697 *metastrongylus elongatus* and *Ascaris lumbricoides* var. *suis*. *J. Biochem. (Tokyo)* **65**, 861–  
698 867 (1969).
- 699 27. Tan, J. H. *et al.* Alternative splicing of *coq-2* controls the levels of rhodoquinone in animals.  
700 *eLife* **9**, e56376 (2020).
- 701 28. Roberts Buceta, P. M. *et al.* The kynurenine pathway is essential for rhodoquinone  
702 biosynthesis in *Caenorhabditis elegans*. *J. Biol. Chem.* **294**, 11047–11053 (2019).
- 703 29. Blaxter, M. *Caenorhabditis elegans* is a nematode. *Science* **282**, 2041–2046 (1998).

- 704 30. Hoebeke, J., Van Nijen, G. & De Brabander, M. Interaction of oncodazole (R 17934), a new  
705 antitumoral drug, with rat brain tubulin. *Biochem. Biophys. Res. Commun.* **69**, 319–324  
706 (1976).
- 707 31. Tamaoki, T. *et al.* Staurosporine, a potent inhibitor of phospholipid/Ca<sup>++</sup>dependent protein  
708 kinase. *Biochem. Biophys. Res. Commun.* **135**, 397–402 (1986).
- 709 32. Hsiang, Y. H., Hertzberg, R., Hecht, S. & Liu, L. F. Camptothecin induces protein-linked DNA  
710 breaks via mammalian DNA topoisomerase I. *J. Biol. Chem.* **260**, 14873–14878 (1985).
- 711 33. Chen, B. *et al.* Inhibitory mechanism of reveromycin A at the tRNA binding site of a class I  
712 synthetase. *Nat. Commun.* **12**, 1616 (2021).
- 713 34. Anger, E. E., Yu, F. & Li, J. Aristolochic Acid-Induced Nephrotoxicity: Molecular Mechanisms  
714 and Potential Protective Approaches. *Int. J. Mol. Sci.* **21**, E1157 (2020).
- 715 35. Pearson, R. D. & Hewlett, E. L. Niclosamide therapy for tapeworm infections. *Ann. Intern.*  
716 *Med.* **102**, 550–551 (1985).
- 717 36. Frayha, G. J., Smyth, J. D., Gobert, J. G. & Savel, J. The mechanisms of action of  
718 antiprotozoal and anthelmintic drugs in man. *Gen. Pharmacol.* **28**, 273–299 (1997).
- 719 37. Mogi, T. *et al.* Siccanin rediscovered as a species-selective succinate dehydrogenase  
720 inhibitor. *J. Biochem. (Tokyo)* **146**, 383–387 (2009).
- 721 38. Nose, K. & Endo, A. Mode of action of the antibiotic siccanin on intact cells and  
722 mitochondria of Trichophyton mentagrophytes. *J. Bacteriol.* **105**, 176–184 (1971).
- 723 39. Burns, A. R. *et al.* Caenorhabditis elegans is a useful model for anthelmintic discovery. *Nat*  
724 *Commun* **6**, 7485 (2015).

- 725 40. Burns, A. R. *et al.* High-throughput screening of small molecules for bioactivity and target  
726 identification in *Caenorhabditis elegans*. *Nat Protoc* **1**, 1906–14 (2006).
- 727 41. Triner, L., Vulliemoz, Y., Schwartz, I. & Nahas, G. G. Cyclic phosphodiesterase activity and  
728 the action of papaverine. *Biochem. Biophys. Res. Commun.* **40**, 64–69 (1970).
- 729 42. Benej, M. *et al.* Papaverine and its derivatives radiosensitize solid tumors by inhibiting  
730 mitochondrial metabolism. *Proc. Natl. Acad. Sci. U. S. A.* **115**, 10756–10761 (2018).
- 731 43. Morikawa, N., Nakagawa-Hattori, Y. & Mizuno, Y. Effect of dopamine,  
732 dimethoxyphenylethylamine, papaverine, and related compounds on mitochondrial  
733 respiration and complex I activity. *J. Neurochem.* **66**, 1174–1181 (1996).
- 734 44. Dilks, C. M. *et al.* Quantitative benzimidazole resistance and fitness effects of parasitic  
735 nematode beta-tubulin alleles. *Int. J. Parasitol. Drugs Drug Resist.* **14**, 28–36 (2020).
- 736 45. Dilks, C. M., Koury, E. J., Buchanan, C. M. & Andersen, E. C. Newly identified parasitic  
737 nematode beta-tubulin alleles confer resistance to benzimidazoles. *Int. J. Parasitol. Drugs*  
738 *Drug Resist.* **17**, 168–175 (2021).
- 739 46. Lautens, M. J. *et al.* Identification of enzymes that have helminth-specific active sites and  
740 are required for Rodoquinone-dependent metabolism as targets for new anthelmintics.  
741 *PLoS Negl. Trop. Dis.* **15**, e0009991 (2021).
- 742 47. Nakagawa, Y., Kuwano, E., Eto, M. & Fujita, T. Effects of Insect-Growth-Regulatory  
743 Benzimidazole Derivatives on Cultured Integument of the Rice Stem Borer and  
744 Mitochondria from Rat Liver. *Agric. Biol. Chem.* **49**, 3569–3573 (1985).
- 745 48. Stiernagle, T. Maintenance of *C. elegans*. *WormBook* 1–11 (2006)  
746 doi:10.1895/wormbook.1.101.1.

- 747 49. Spensley, M., Del Borrello, S., Pajkic, D. & Fraser, A. G. Acute Effects of Drugs on  
748 *Caenorhabditis elegans* Movement Reveal Complex Responses and Plasticity. *G3 Bethesda*  
749 *Md* **8**, 2941–2952 (2018).
- 750 50. Sander, T., Freyss, J., von Korff, M. & Rufener, C. DataWarrior: an open-source program for  
751 chemistry aware data visualization and analysis. *J. Chem. Inf. Model.* **55**, 460–473 (2015).
- 752 51. O’Boyle, N. M., Morley, C. & Hutchison, G. R. Pybel: a Python wrapper for the OpenBabel  
753 cheminformatics toolkit. *Chem. Cent. J.* **2**, 5 (2008).
- 754 52. Cline, M. S. *et al.* Integration of biological networks and gene expression data using  
755 Cytoscape. *Nat. Protoc.* **2**, 2366–2382 (2007).
- 756 53. Long, J. *et al.* Comparison of two methods for assaying complex I activity in mitochondria  
757 isolated from rat liver, brain and heart. *Life Sci.* **85**, 276–280 (2009).
- 758 54. Luo, C., Long, J. & Liu, J. An improved spectrophotometric method for a more specific and  
759 accurate assay of mitochondrial complex III activity. *Clin. Chim. Acta Int. J. Clin. Chem.* **395**,  
760 38–41 (2008).
- 761 55. Janssen, R. C. & Boyle, K. E. Microplate Assays for Spectrophotometric Measurement of  
762 Mitochondrial Enzyme Activity. *Methods Mol. Biol. Clifton NJ* **1978**, 355–368 (2019).
- 763 56. Lagido, C., Pettitt, J., Flett, A. & Glover, L. A. Bridging the phenotypic gap: real-time  
764 assessment of mitochondrial function and metabolism of the nematode *Caenorhabditis*  
765 *elegans*. *BMC Physiol.* **8**, 7 (2008).
- 766 57. Luz, A. L., Lagido, C., Hirschey, M. D. & Meyer, J. N. In Vivo Determination of Mitochondrial  
767 Function Using Luciferase-Expressing *Caenorhabditis elegans*: Contribution of Oxidative

768            Phosphorylation, Glycolysis, and Fatty Acid Oxidation to Toxicant-Induced Dysfunction.

769            *Curr. Protoc. Toxicol.* **69**, 25.8.1-25.8.22 (2016).

770

771

772

773

774

775

776

777

778

779

780 **Figure Legends**

781

782 **Figure Legends**

783

784 **Figure 1: Ubiquinone-coupled aerobic and rholoquinone-coupled anaerobic electron**

785 **transport chain (ETC). A. Ubiquinone-coupled aerobic ETC.** Electrons enter the quinone pool

786 via Complex I or Complex II and exit via Complex IV — oxygen is the terminal electron acceptor.

787 Ubiquinone is the quinone electron carrier and protons are pumped across the mitochondrial

788 membrane by Complex I, III and IV; ATP is synthesised by Complex V powered by the proton

789 motive force. **B. Rholoquinone-coupled anaerobic ETC.** Electrons enter the quinone pool via

790 Complex I only and exit via Complex II which acts as a fumarate reductase — fumarate is the

791 terminal electron acceptor. Rholoquinone is the quinone electron carrier and only Complex I

792 pumps protons. **C. Key targets for inhibitors of Rholoquinone-coupled anaerobic ETC.**

793 Compounds that target Complex I (sole electron entry point, sole proton pump), Complex II (key

794 electron exit point), and RQ synthesis (key quinone electron carrier) are likely to act as

795 anthelmintics.

796

797 **Figure 2: Screens to identify inhibitors of RQ-dependent metabolism (RQDM). A. Phenotype**

798 **of *C. elegans* lacking RQDM.** Wild-type worms exposed to 200  $\mu$ M KCN for 15hrs are immobile

799 but rapidly recover full movement when KCN is removed (black curve). *kynu-1* null mutants that

800 lack RQ and thus cannot carry out RQDM are dead after 15 hr KCN exposure and thus cannot

801 recover movement. The ability to recover movement after 15 hrs of 200  $\mu$ M KCN exposure is

802 thus a simple assay for the ability to carry out RQDM. Data are the mean of three biological

803 replicates; errors are S.E.M. **B. Effect of ETC inhibitors on RQDM.** Inhibition of Complex I

804 (rotenone) or Complex II (wact-11) prevents worms carrying out RQDM. **C. Data from screens**

805 **of ~480 natural products (NPDs) in RQDM assays and growth assays.** Worms were treated

806 with each NP at 50  $\mu$ M and screened in 2 assays — the RQDM assay and a quantitative growth

807 assay (see Materials and Methods). Each dot represents a single NP and is the mean of 3

808 biological replicates. Data are presented as modified z-scores relative to the median. 8 NPs

809 showed significant effects ( $r.z < -3$ ) in the RQDM assay alone; 9 in the growth assay alone; and 2

810 in both assays.

811

812 **Figure 3: The antifungal Siccanin inhibits *C. elegans* Succinate Dehydrogenase (Complex II) A.**

813 Complex II inhibitory dose-response curves for siccanin and wact-11 against complex II from

814 wild-type (N2) worm mitochondria (purple and black) and *M. musculus* liver mitochondria

815 (yellow and blue). Assays were conducted as described in Materials and Methods; all data are

816 the mean of 4 biological repeats and errors are the S.E.M. **B. Mutation of the quinone binding**

817 **pocket of complex II causes insensitivity to Siccanin.** Complex II inhibitory dose-response

818 curves for siccanin and wact-11 against complex II from *sdhc-1* (RP2749) mutant worm

819 mitochondria (magenta and green). The RP2749 strain is homozygous for a mutation in the

820 quinone binding pocket of Complex II and causes resistance to wact-11. **C and D. The**

821 **mutational spectrum of siccanin and wact-11 resistance is distinct.** Two strains homozygous

822 for mutations in the SDHC-1 subunit of Complex II (R47K in yellow and T66I in red) were treated



823 with 200  $\mu$ M KCN and either wact-11 (C) or siccanin (D) at 25  $\mu$ M for 15hrs, after which KCN  
824 was diluted and worm movement measured for 3hrs. In all cases data are the mean of 3  
825 biological replicates. **E.** Worm motility post 3 hours KCN dilution for wact-11 family resistant  
826 mutants that harbour different mutations in the ubiquinone binding pocket; different  
827 mutations show altered susceptibility to complex II inhibition by siccanin or wact-11. **F.** Activity  
828 profiles of siccanin and wact-11 against *C. elegans* (growth and motility) and HEK293 cells  
829 (viability). While wact-11 activity is specific to *C. elegans*, siccanin shows less selectivity.

830 **Figure 4: Structural Profiling of hits and associated derivatives/analogs from RIKEN NP library.**  
831 Network based on the structural similarity of the 137 molecules from the seven structural  
832 classes identified as hits in the RIKEN NP Library. Nodes represent molecules, and edges  
833 connect molecules with scaffolds that have a pairwise Tanimoto/FP2 score > 0.55. The cluster  
834 to which each molecule belongs is indicated by the background circle, while the molecules  
835 effect in either condition of the screen is indicated by the node fill colour. The seven clusters  
836 are based off the chemical similarity performed by RIKEN NPDepo. Structures that share the  
837 similar scaffold are connected, while more distantly related molecule are related by a common  
838 substructure. Above each cluster is the murcko scaffold (for ring systems > 1) of the initial hit  
839 identified in the chemical screen.

840 **Figure 5: Cluster 4 compounds inhibit Complex I of the ETC.** A. Structures of Cluster 4 hits and  
841 papaverine. **B. Papaverine and structurally related cluster 4 compounds inhibit Complex I.**  
842 Complex I activity was assessed spectrophotometrically at 600nm following reduction of a  
843 colorimetric dye (DCIP) by purified *C. elegans* (N2) mitochondria. Data are mean of 4  
844 independent replicates; error bars show the standard error of the mean. All four cluster 4  
845 compounds inhibit complex I like papaverine, an FDA approved spasmodic with documented  
846 effects on metabolism and complex I inhibition. **C. Papaverine shows no species selectivity.**  
847 Purified mitochondria from *C.elegans*, mouse heart or bovine heart were treated with different  
848 doses of papaverine and Complex I activity measured. **D. NPD8790 shows significant species**  
849 **selectivity.** Purified mitochondria from *C.elegans*, mouse heart or bovine heart were treated  
850 with different doses of NPD8790 and Complex I activity measured.

851 **Figure 6: NPD8790 affects Complex I activity but commercial benzimidazoles do not.** A-B.  
852 Structures of 4 benzimidazole anthelmintics and NPD8790. **C.** Complex I inhibitory dose-  
853 response curves for NPD8790 and several commercial benzimidazole anthelmintics  
854 (Albendazole, Fenbendazole, Mebendazole, Thiabendazole) against complex I from wild-type  
855 (N2) *C. elegans*.

856 **Figure 7. Loss of function mutations in the *C. elegans ben-1* gene confer a high degree of**  
857 **resistance to commercial benzimidazole anthelmintics, but not to NPD8790.** **A. Inhibition of**  
858 **worm growth by albendazole is affected by *ben-1* mutations.** *C. elegans* strains were exposed  
859 to different doses of albendazole and the growth was measured after 6-days in the presence of  
860 drug. Data are mean of 4 independent replicates; error bars show the standard error of the  
861 mean. Wild-type (N2; black) worms were strongly affected but strains homozygous for different  
862 mutations in the *ben-1* gene show strong resistance. **B. Albendazole has no effect on RQDM.**

863 *C.elegans* strains were exposed to different doses of albendazole in the presence of 200  $\mu$ M  
864 KCN for 15hrs. Drugs were diluted and movement was measured after 3hrs. Wild-type (N2;  
865 black) and strains carrying mutations in *ben-1* all showed good recovery of movement. **C.**  
866 **NPD8790 has little effect of *C.elegans* growth in normoxia.** *C.elegans* strains were exposed to  
867 different doses of NPD8790 and the growth was measured after 6-days in the presence of drug.  
868 Data are mean of 4 independent replicates; error bars show the standard error of the mean.  
869 Wild-type (N2; black) worms and strains homozygous for different mutations in the *ben-1* gene  
870 show no growth defects relative to controls except at extremely high NPD8790 concentrations.  
871 **D. NPD8790 blocks RQDM.** *C.elegans* strains were exposed to different doses of NPD8790 in  
872 the presence of 200  $\mu$ M KCN for 15hrs. Drugs were then diluted, and movement was measured  
873 after 3hrs. Wild-type (N2; black) and strains carrying mutations in *ben-1* all showed similar  
874 inhibition of RQDM. Data are mean of at least 4 independent replicates; error bars show the  
875 standard error of the mean. **E. *ben-1* mutations have no effect on ability of NPD8790 to inhibit**  
876 **Complex I.** Mitochondria were purified from wild-type worms or from strains carrying a variety  
877 of *ben-1* mutations and Complex I activity assayed at a range of doses of NPD8790.

878 **Figure 8. Three different classes of benzimidazoles act as Complex I inhibitors.** Panels **A, D** and  
879 **G** show core structures of Class A, B and C benzimidazoles identified as Complex I inhibitors in  
880 our screens. In the remaining panels we show inhibition of Complex I activity either in purified  
881 *C. elegans* (black curves) or bovine mitochondria (red curves) for representative molecules from  
882 each Class. Each curve is the mean of 2 independent replicates; errors are the S.E.M.

883 **Supplemental Figure 1. In vitro assays for each complex of the ETC.** Activity assays were  
884 performed for each of the 4 core complexes of the electron transport chain using mitochondria  
885 isolated from wild-type (N2) *C. elegans*: (A) Complex I, (B) Complex II, (C) Complex III, (D)  
886 Complex IV. Activity was determined spectrophotometrically by following either the change in  
887 the reduction or oxidation of a colorimetric dye (DCIP [600nm] – Complexes I & II, Cytochrome  
888 C [550nm] – Complexes III & IV) over time; details in Materials and Methods. The initial rate of  
889 each colourimetric reaction was determined both in the presence of DMSO and a saturating  
890 dose of inhibitor to determine the specific activity of each complex in each of the respective *in*  
891 *vitro* assays. Percent inhibition of a given compound can thus be determined by measuring the  
892 rate of change in absorbance in mitochondria incubated with drug compared to the change in  
893 absorbance with only solvent. Data are mean of 4 independent replicates; error bars show the  
894 standard error of the mean. **E.** Known inhibitors of each of the four complexes (CI: Rotenone,  
895 CII: Wact-11, CIII: Antimycin A, CIV: KCN) were screened at 100 $\mu$ M in *in vitro* colourimetric  
896 assays. Percent activity of each of the 5 ETC complexes is shown for the 4 different inhibitors.  
897 Data are mean of 4 independent replicates; error bars show the standard error of the mean.

898 **Supplemental Figure 2: Loss of function mutations in the *C. elegans ben-1* gene confer a high**  
899 **degree of resistance to existing benzimidazole anthelmintics, but not to NPD8790.** Growth  
900 and development dose-response curves for NPD8790 and several existing benzimidazole  
901 anthelmintics (Albendazole, Fenbendazole, Mebendazole, Thiabendazole) against wild-type  
902 (N2) and several benzimidazole-resistant (*ben-1* loss of function) worm strains. Relative growth  
903 was scored after 6-days in the presence of drug. Data are mean of 3 independent replicates;

904 error bars show the standard error of the mean. While *ben-1* loss of function mutations allow  
905 population growth in the presence of 4 different benzimidazole anthelmintics, they do not  
906 confer any advantage to survival in the presence of NPD8790. **(Lower)** KCN survival dose-  
907 response curves for NPD8790 and several existing benzimidazole anthelmintics against wild-  
908 type (N2) and benzimidazole-resistant (*ben-1* loss of function) worm strains. Relative motility  
909 was scored 3 hours following KCN-dilution. In contrast to existing benzimidazole anthelmintics,  
910 NPD8790 elicits a strong phenotype in the KCN survival assay that is independent of *ben-1* loss  
911 of function mutations.

912 **Supplemental Figure 3: Benzimidazole analogs elicit a rapid, dose-dependent decrease in ATP**  
913 **levels in *C. elegans*.** ATP levels of *C. elegans* L1 worms constitutively expressing a firefly  
914 luciferase construct (*Photinus pyralis*) were determined after incubation in various doses of  
915 drug for 6 hours. Percent ATP was calculated relative to untreated controls based on measured  
916 bioluminescence following the addition of D-luciferin to worms. Data are mean of 4  
917 independent replicates; error bars show the standard error of the mean; known complex I  
918 inhibitors are displayed in red box for comparison. Similarly, to treatment with well established  
919 complex I inhibitors, incubation of *C. elegans* with benzimidazole analogs for 6 hours results in  
920 severely diminished ATP levels relative to untreated controls. In contrast, treatment with the  
921 anthelmintic benzimidazole (known to target microtubules and not the ETC) does not result in  
922 decreased ATP levels.

923

924

925

926

927

928

929

930

931

932

933

934

935

A.

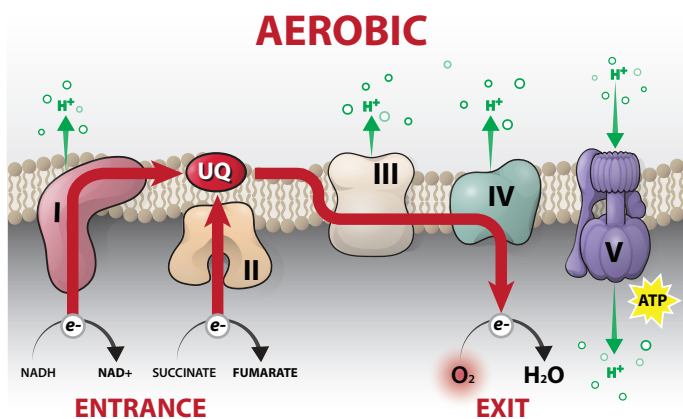

B.

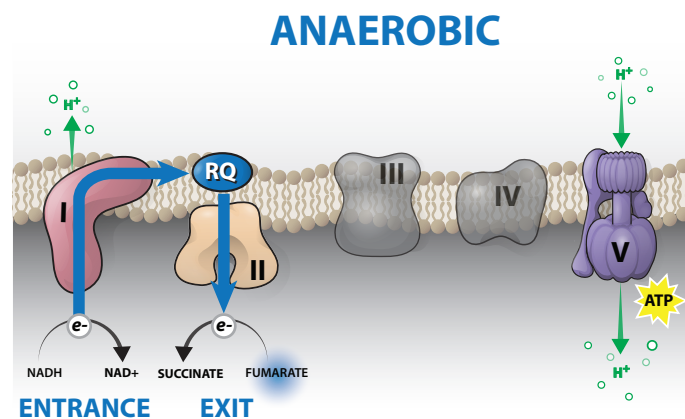

C.

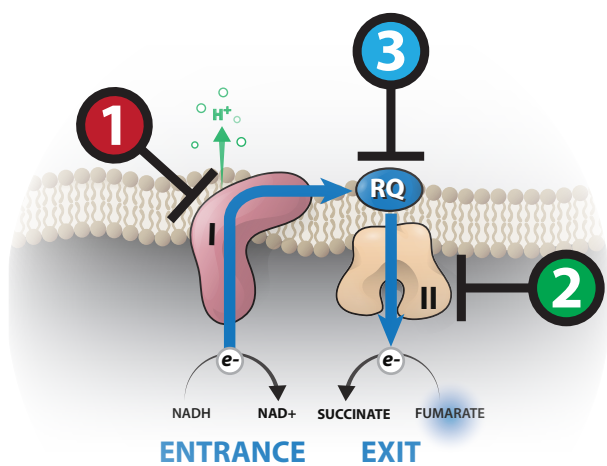

Figure 1.

Davie et al.

**A.**

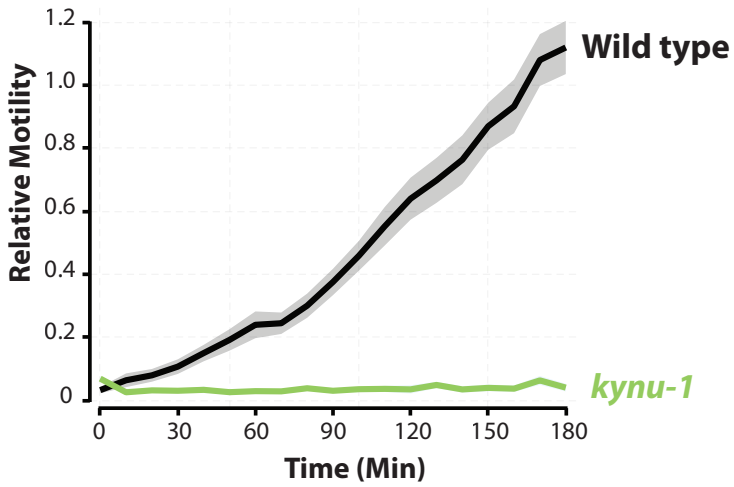

**B.**

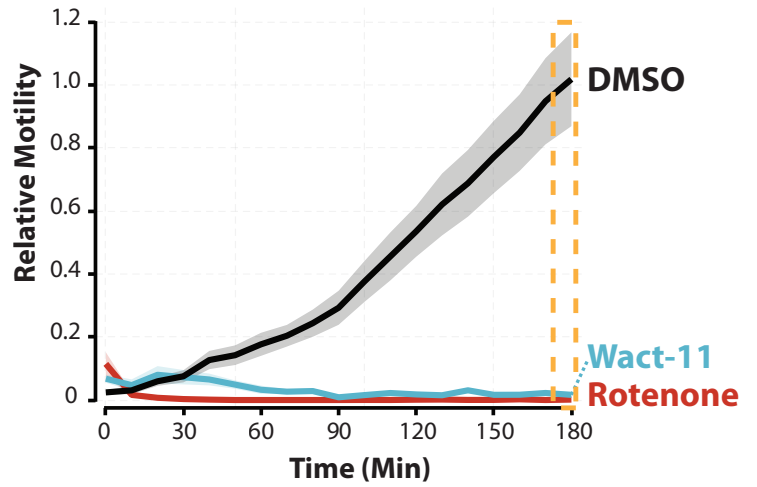

**C.**

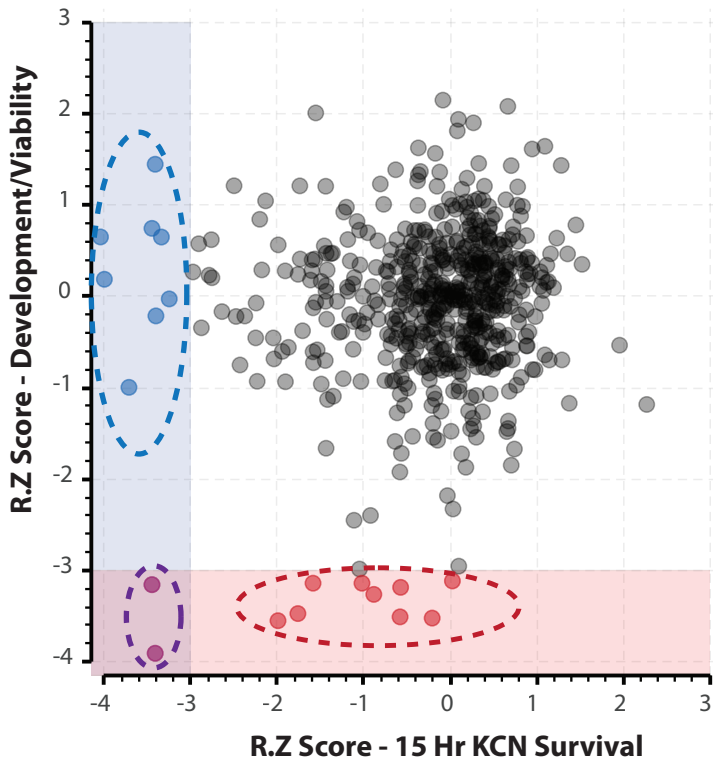

**Figure 2.**

**Davie et al.**

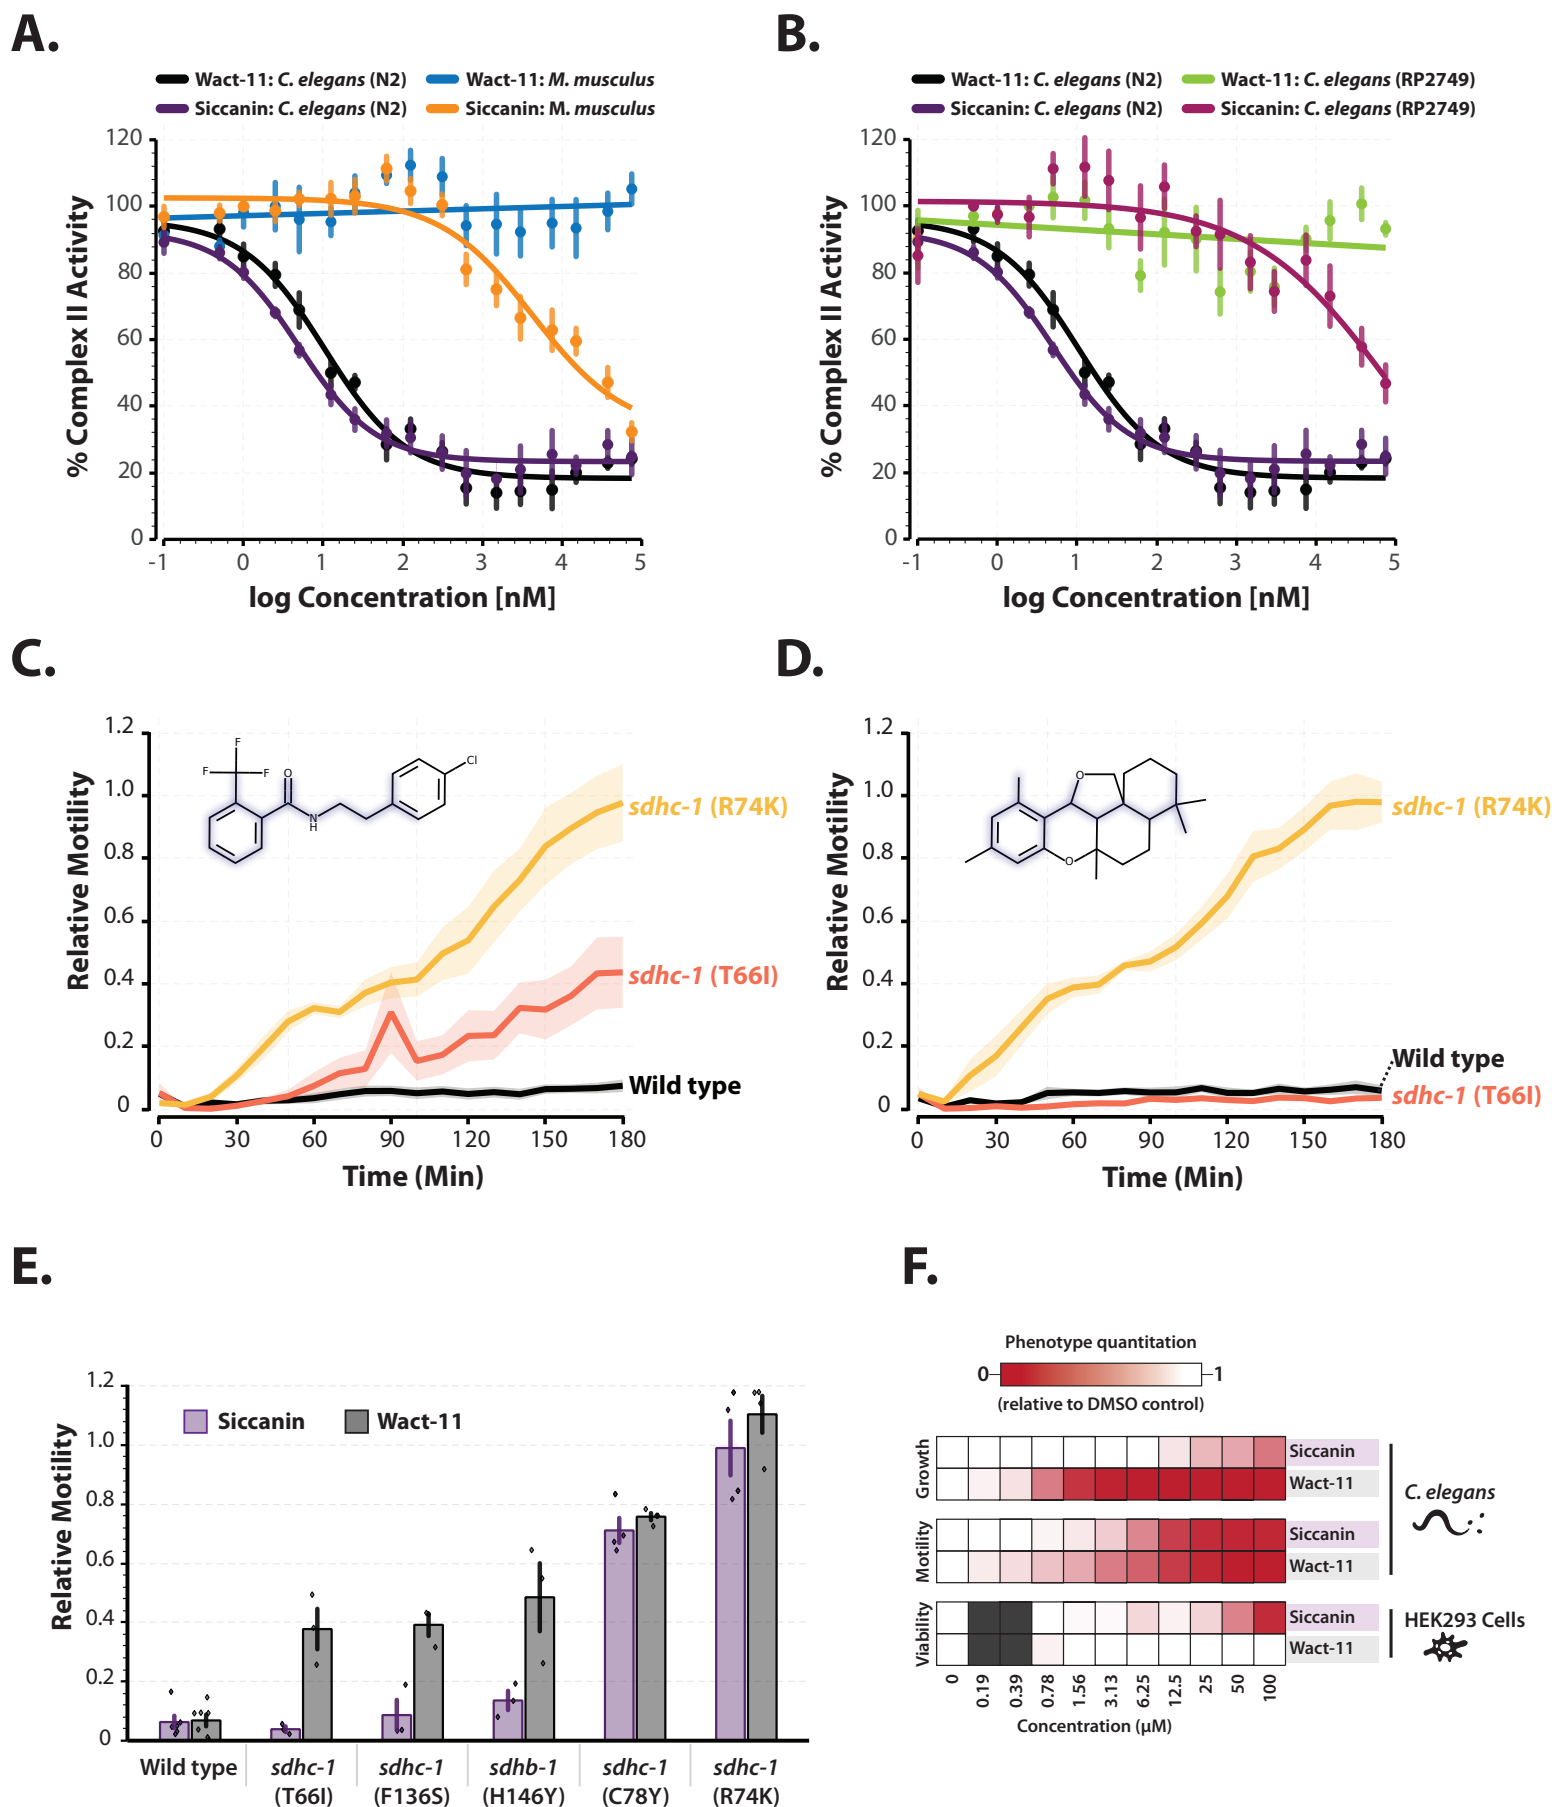

**Figure 3.**

**Davie et al.**

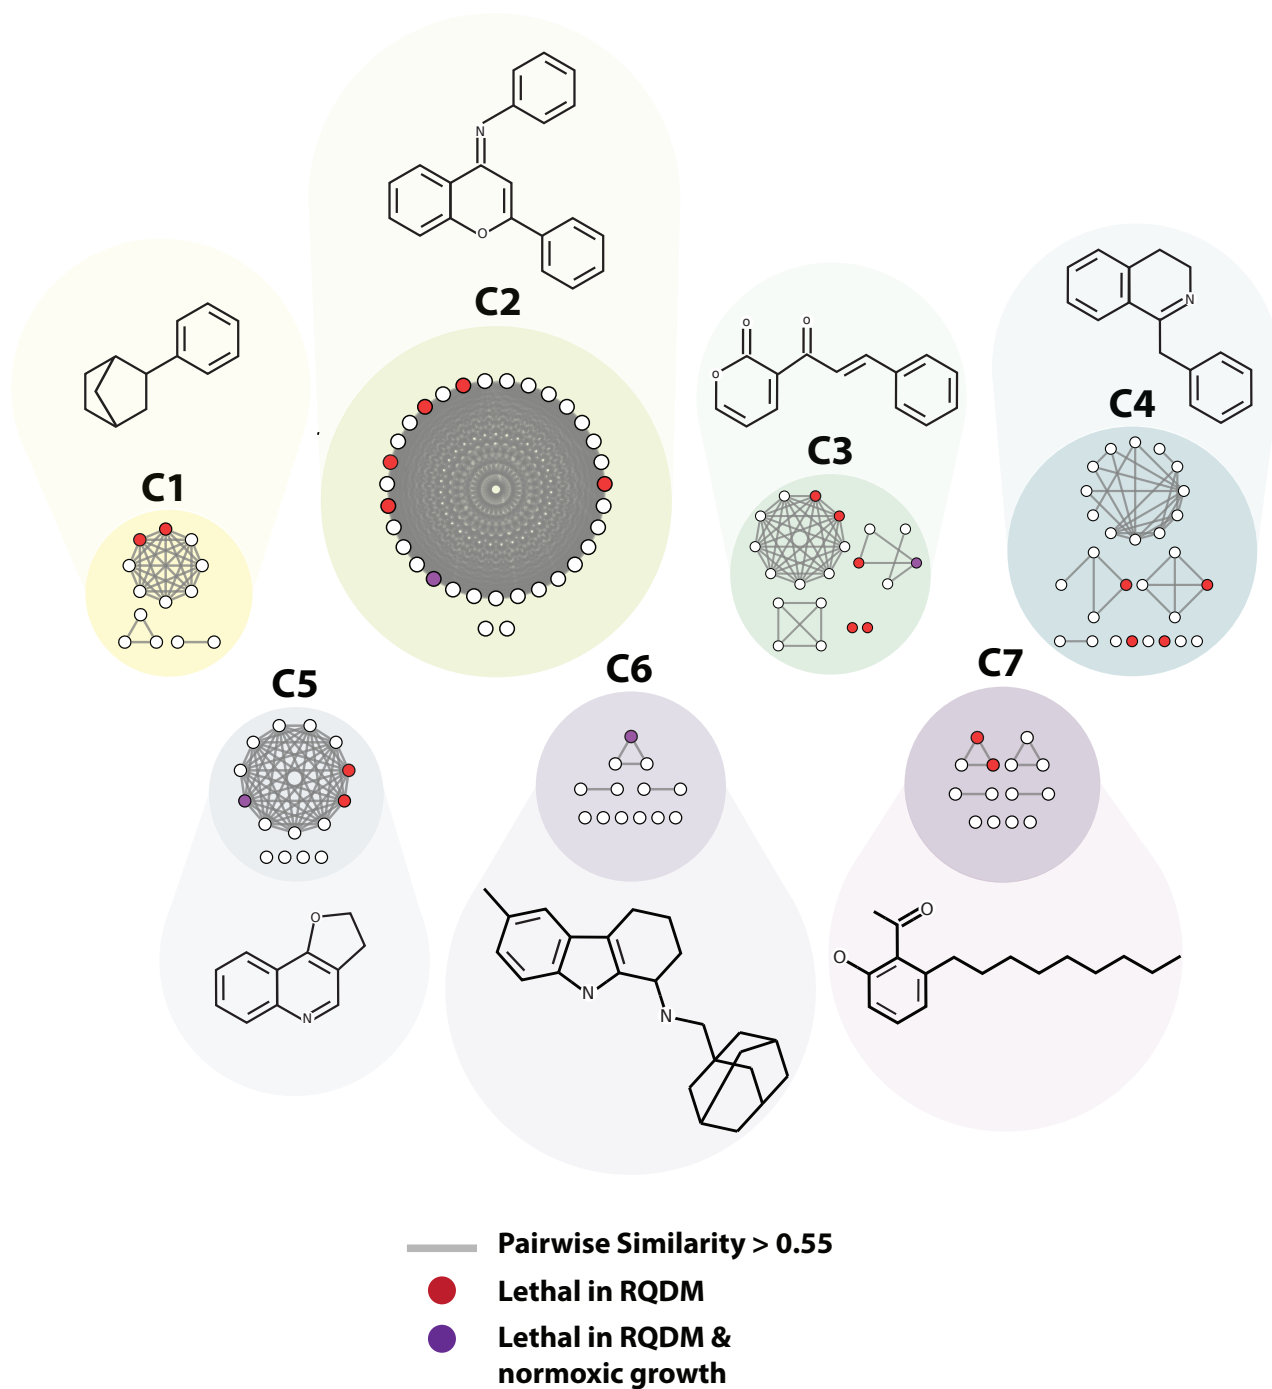

**Figure 4.**

**Davie et al.**

**A.**

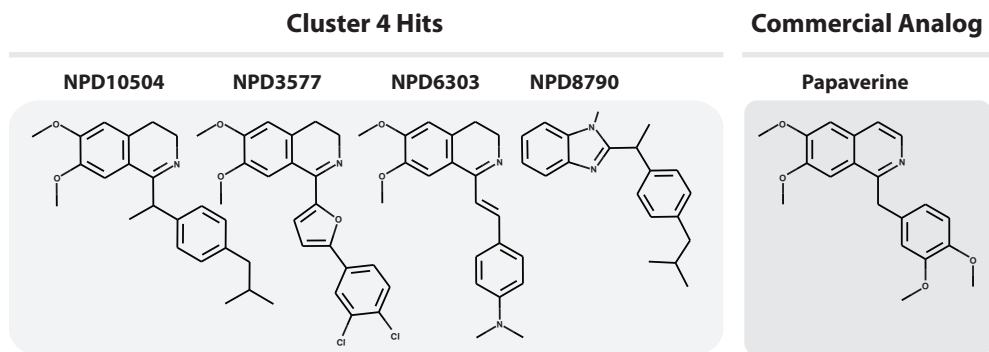

**B.**

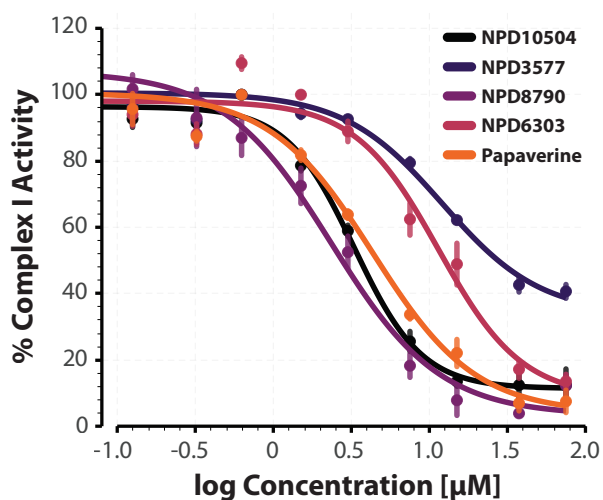

**C.**

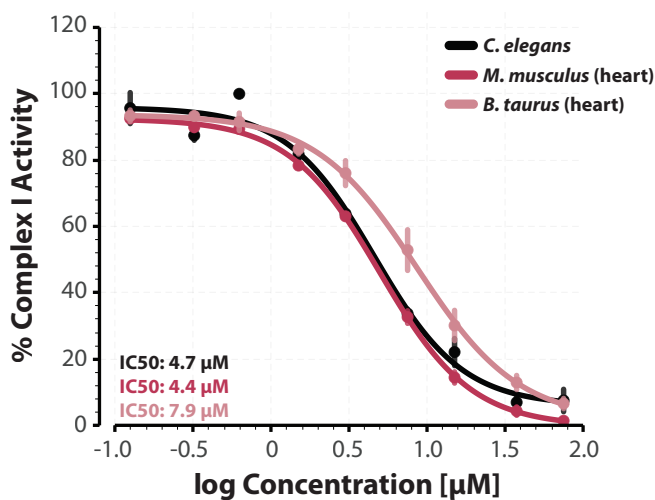

**D.**

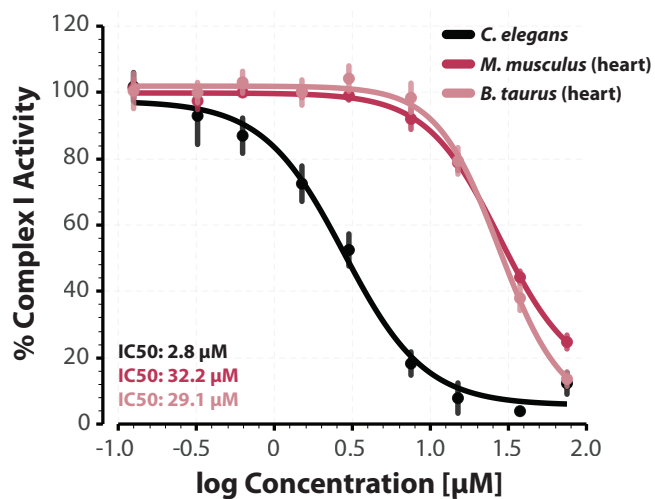

**Figure 5.**

**Davie et al.**



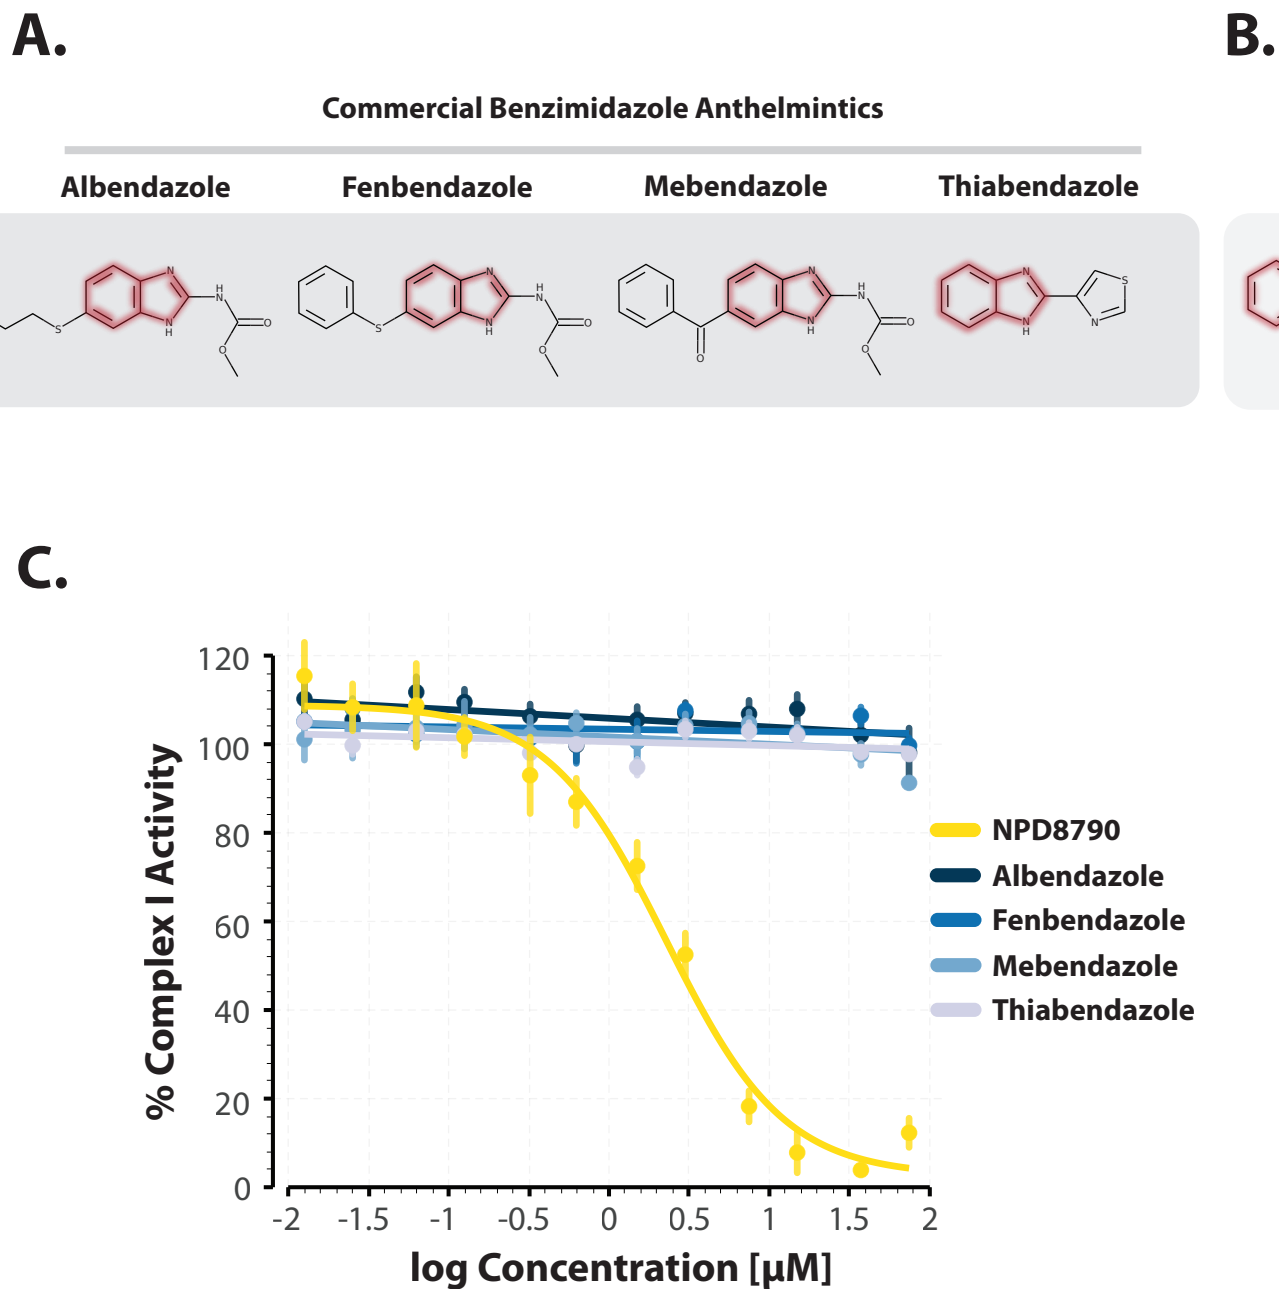

**A.**

**Albendazole**

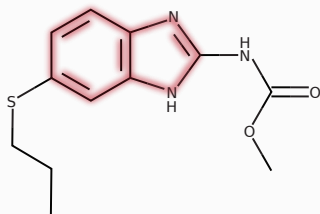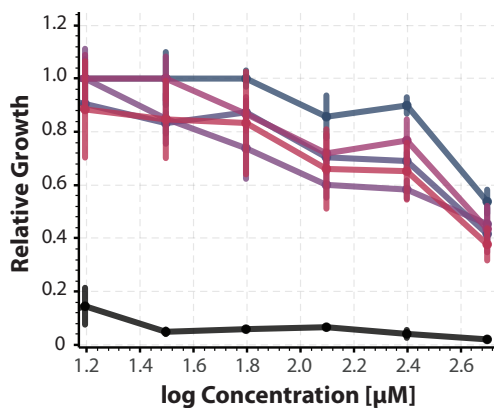

**B.**

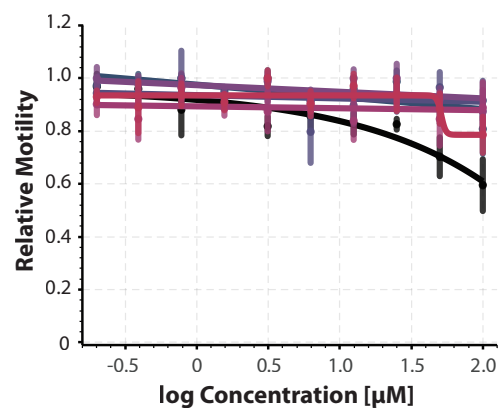

**C.**

**NPD8790**

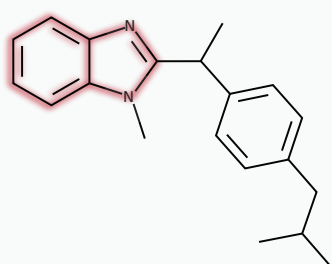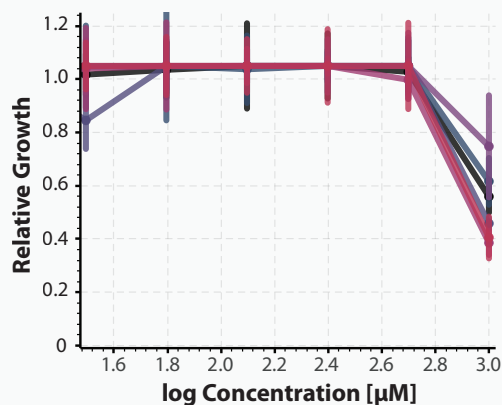

**D.**

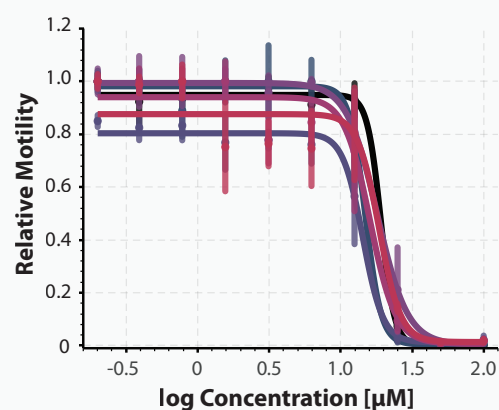

**E.**

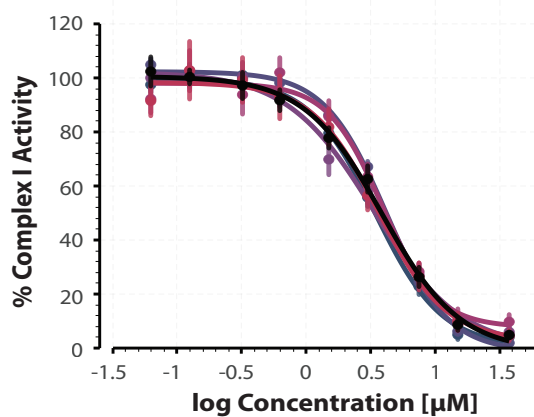

- N2
- ECA882 (Deletion)
- CB3474 (G104D)
- ECA917 (F200Y)
- ECA1075 (F167A)
- ECA1080(E198A)

**Figure 7.**

**Davie et al.**

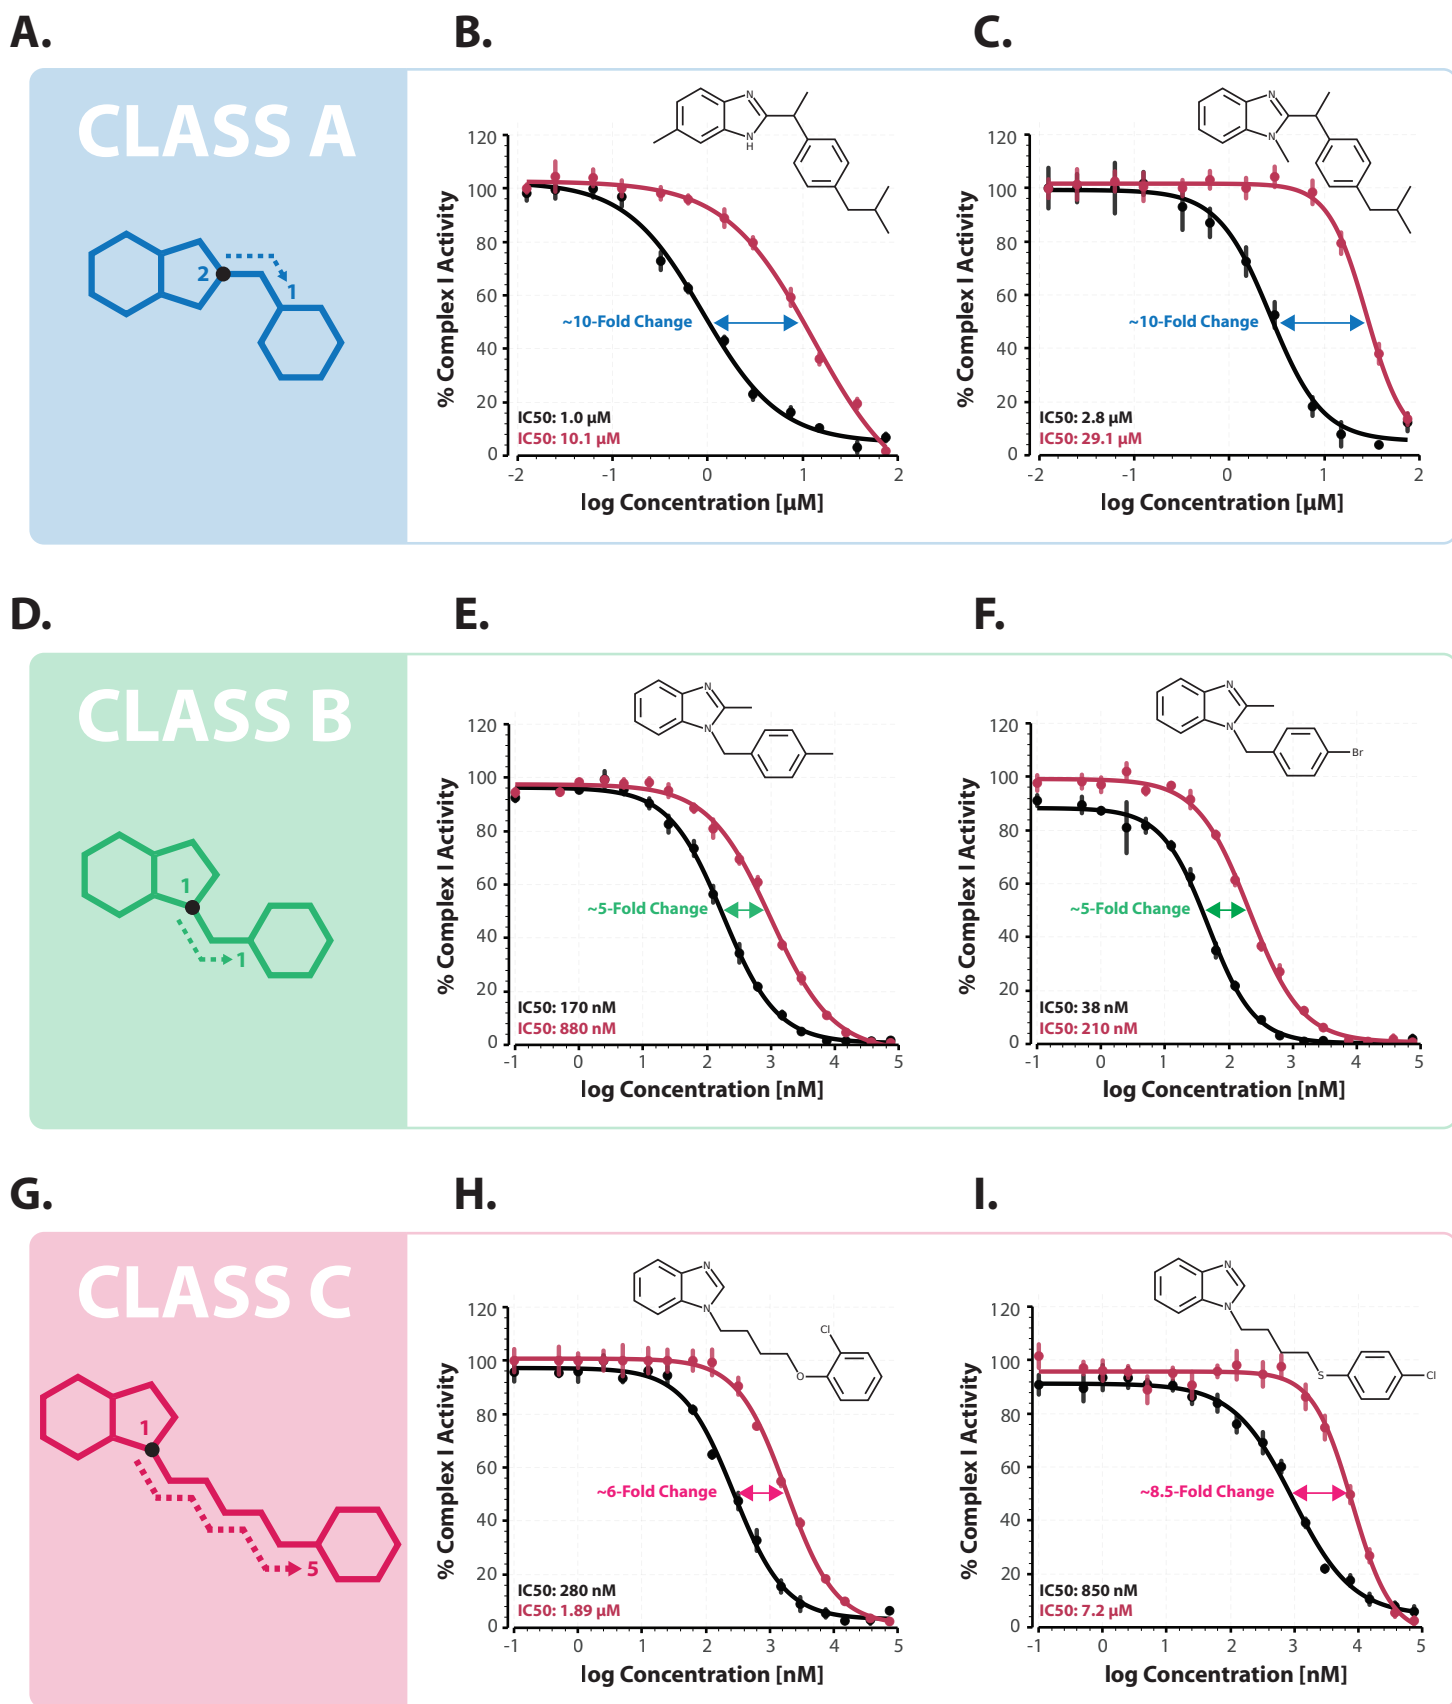

**Figure 8.**

**Davie et al.**

**A.**

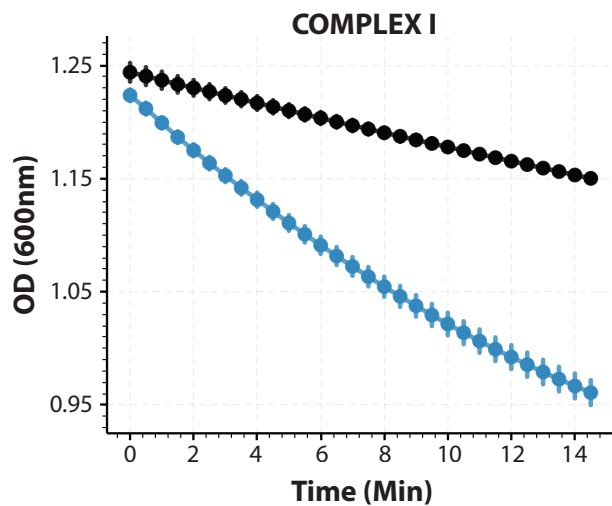

**B.**

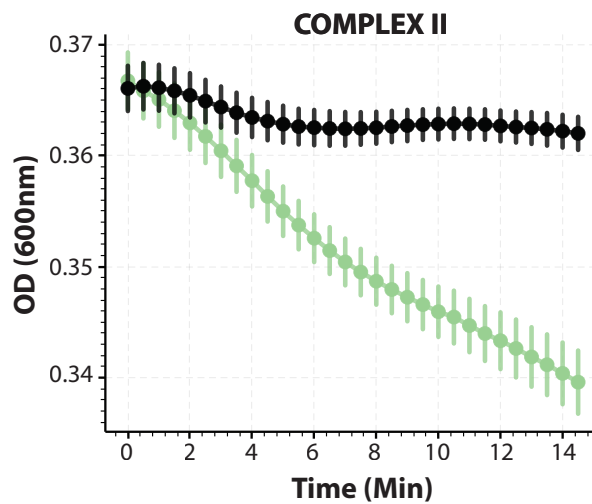

**C.**

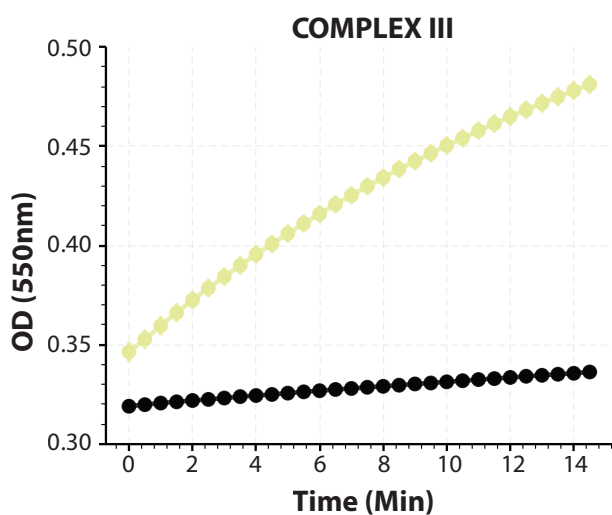

**D.**

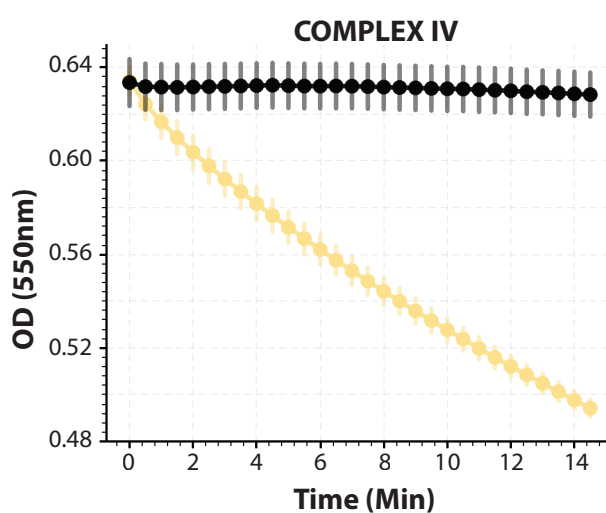

**E.**

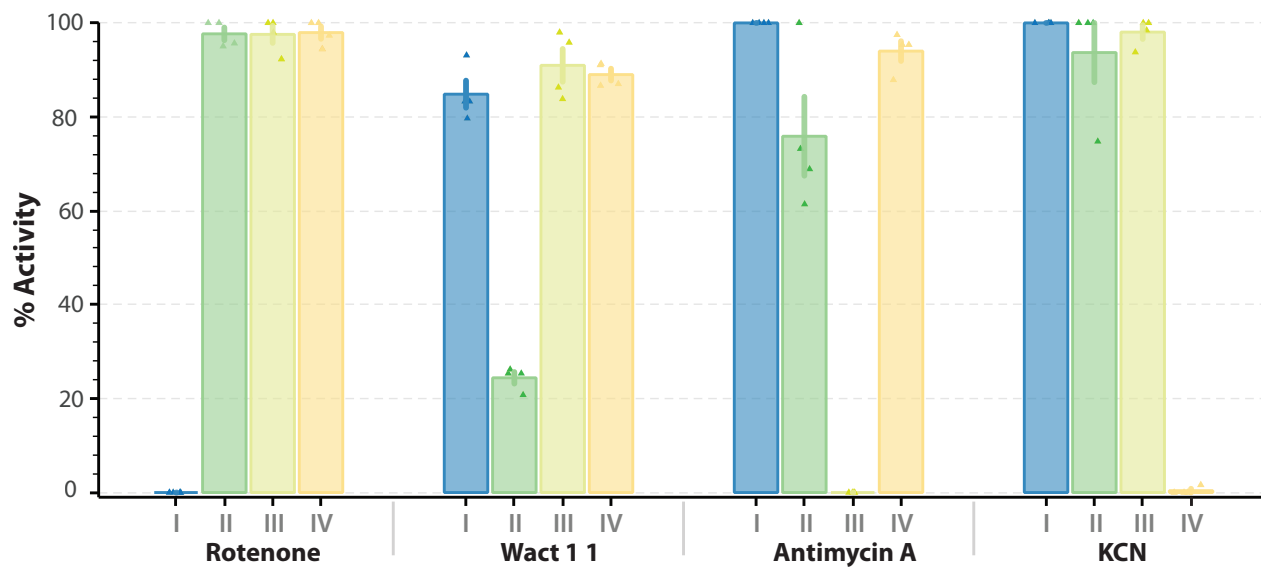

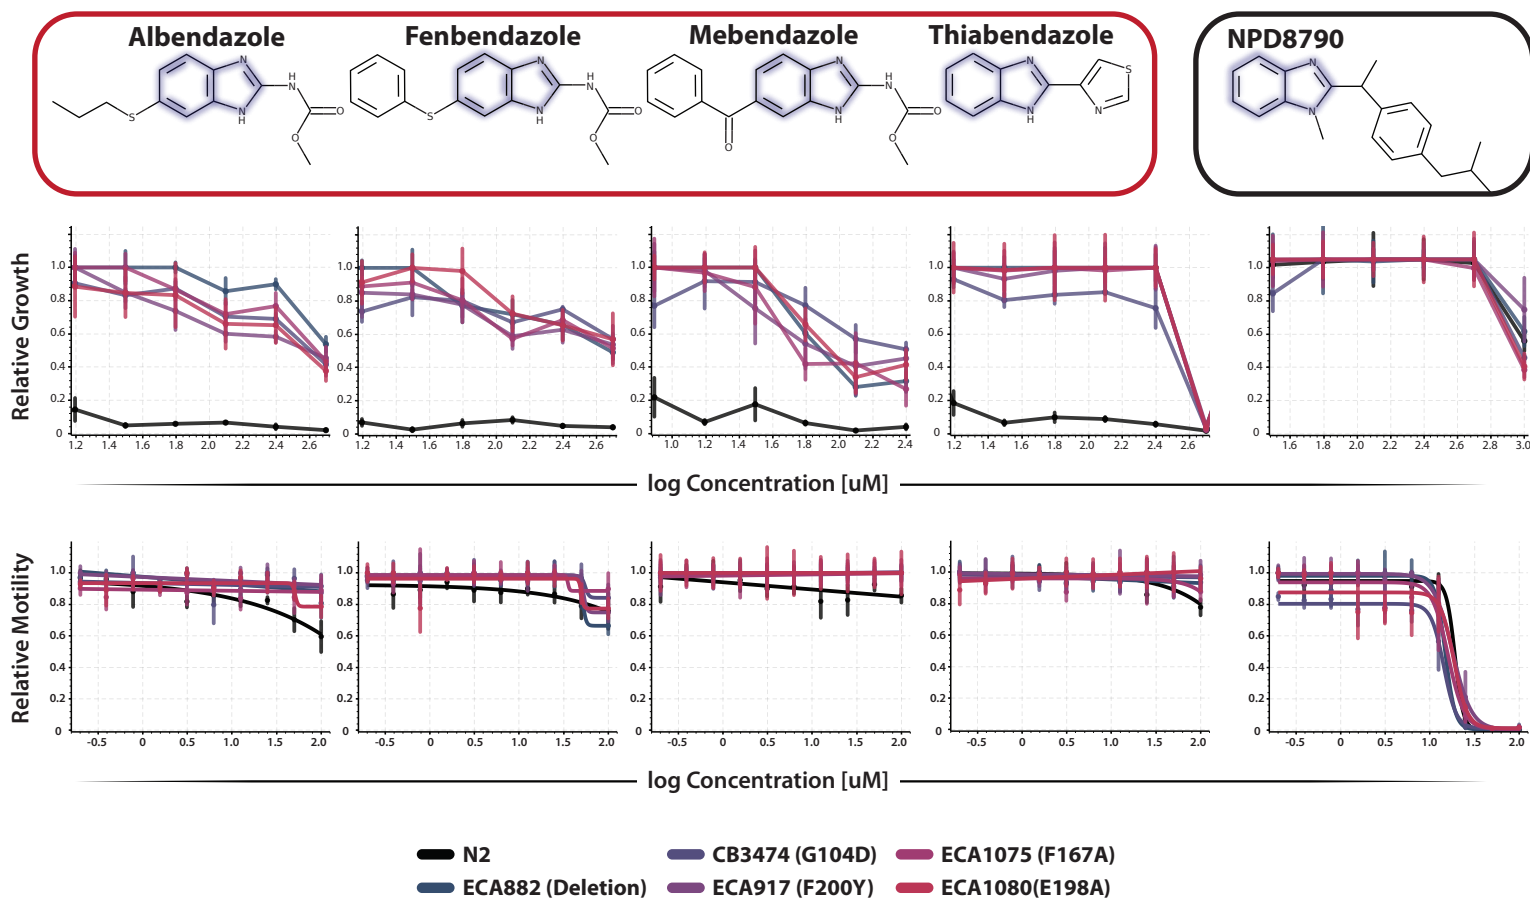

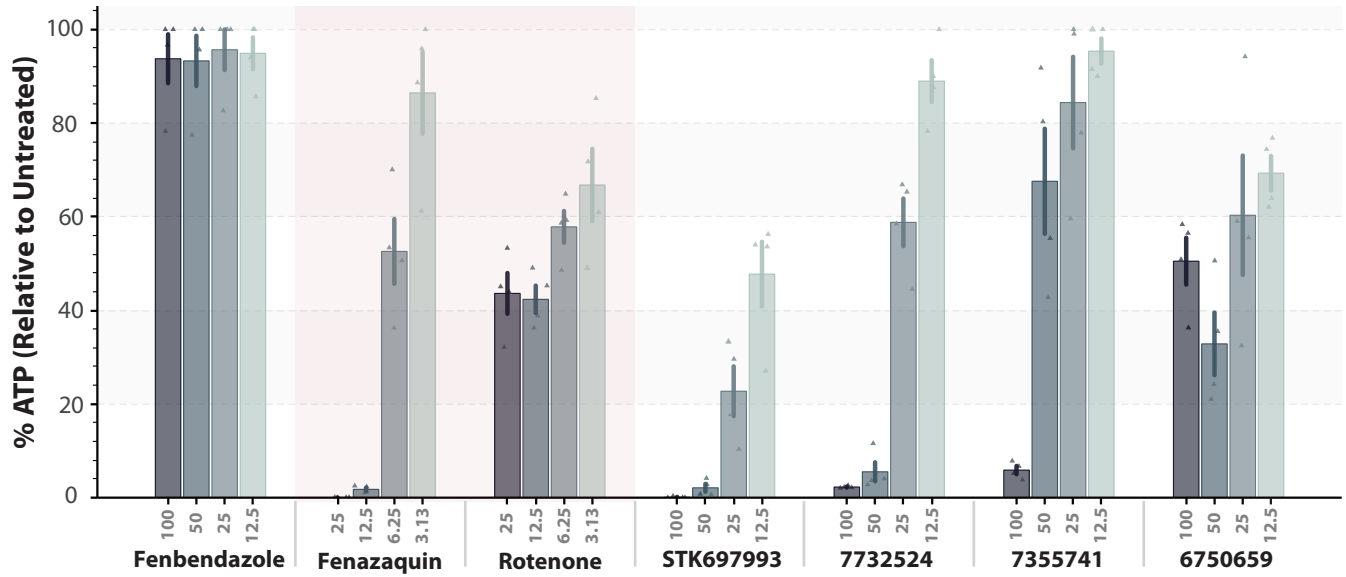

**Table 1 – Summary of the effect of Riken NPDepo hits on the activity of mitochondrial ETC complexes (I-IV).** Compounds that reduced activity of a complex below 50% at 100  $\mu$ M are highlighted in red.

| Cluster | Compound       | % Activity     |                |                |                |
|---------|----------------|----------------|----------------|----------------|----------------|
|         |                | I              | II             | III            | IV             |
| Control | Rotenone       | 0.0 $\pm$ 0.0  | 97.7 $\pm$ 1.4 | 97.6 $\pm$ 1.8 | 97.9 $\pm$ 1.3 |
| Control | Wact-11        | 84.8 $\pm$ 2.9 | 24.3 $\pm$ 1.2 | 90.1 $\pm$ 3.5 | 89.0 $\pm$ 1.3 |
| Control | Antimycin A    | 100 $\pm$ 0.0  | 75.9 $\pm$ 8.4 | 0.0 $\pm$ 0.0  | 94.0 $\pm$ 2.1 |
| Control | KCN            | 100 $\pm$ 0.0  | 93.7 $\pm$ 6.3 | 98.1 $\pm$ 1.5 | 0.4 $\pm$ 0.4  |
| 1       | NPD8902        | 27.8 $\pm$ 1.4 | 100 $\pm$ 7.3  | 74.5 $\pm$ 5.5 | 0.8 $\pm$ 0.8  |
| 2       | NPD8034        | 99.3 $\pm$ 5.2 | 89.0 $\pm$ 9.5 | 95.1 $\pm$ 3.0 | 96.0 $\pm$ 5.6 |
| 2       | NPD1450        | 84.5 $\pm$ 4.1 | 100 $\pm$ 8.7  | 100 $\pm$ 1.9  | 100 $\pm$ 6.6  |
| 2       | NPD6380        | 86.4 $\pm$ 4.5 | 100 $\pm$ 4.9  | 100 $\pm$ 2.7  | 100 $\pm$ 8.8  |
| 3       | NPD8298        | 79.9 $\pm$ 2.5 | 100 $\pm$ 10.1 | 100 $\pm$ 4.9  | 100 $\pm$ 4.3  |
| 3       | NPD6240        | 100 $\pm$ 3.6  | 87.7 $\pm$ 7.6 | 58.2 $\pm$ 4.6 | 26.8 $\pm$ 1.5 |
| 3       | FSL0005        | 91.9 $\pm$ 1.5 | 80.9 $\pm$ 4.0 | 100 $\pm$ 2.5  | 92.3 $\pm$ 6.0 |
| 3       | NPD8366        | 100 $\pm$ 3.2  | 86.4 $\pm$ 6.7 | 76.0 $\pm$ 2.2 | 97.7 $\pm$ 5.5 |
| 4       | NPD10504       | 5.6 $\pm$ 3.0  | 100 $\pm$ 13.7 | 80.0 $\pm$ 3.0 | 74.5 $\pm$ 2.7 |
| 4       | NPD3577        | 36.8 $\pm$ 4.3 | 100 $\pm$ 9.9  | 66.0 $\pm$ 7.3 | 81.1 $\pm$ 4.7 |
| 4       | NPD6303        | 12.7 $\pm$ 1.3 | 100 $\pm$ 7.9  | 78.1 $\pm$ 2.8 | 83.1 $\pm$ 3.5 |
| 4       | NPD8790        | 5.3 $\pm$ 2.9  | 99.7 $\pm$ 8.6 | 64.0 $\pm$ 1.8 | 79.8 $\pm$ 2.7 |
| 5       | NPD390         | 18.5 $\pm$ 1.8 | 82.9 $\pm$ 3.7 | 85.2 $\pm$ 3.7 | 92.1 $\pm$ 4.2 |
| 6       | NPL50604-01    | 0.5 $\pm$ 0.5  | 82.6 $\pm$ 6.5 | 34.1 $\pm$ 0.6 | 21.5 $\pm$ 2.7 |
| 7       | Anacardic Acid | 93.0 $\pm$ 3.3 | 87.6 $\pm$ 2.7 | 0.0 $\pm$ 0.0  | 15.8 $\pm$ 2.3 |

**Supplementary Table 1 - Bioactivity of hits identified in Riken NPDepo screens for molecules that disrupt *C. elegans* survival in anaerobic conditions (KCN).**

| Cluster   | Compound                                    | Bioactivity               |                               |                  |
|-----------|---------------------------------------------|---------------------------|-------------------------------|------------------|
|           |                                             | <i>C. elegans</i>         |                               | HEK293 Viability |
|           |                                             | KCN Survival<br>EC50 (μM) | Wild type Growth<br>LC50 (μM) | LC50 (μM)        |
| Control   | Rotenone                                    | 0.5                       | 3.3                           | ~0.79            |
| Control   | Wact-11                                     | 2                         | 0.7                           | >50              |
| Authentic | Siccanin                                    | 8                         | 62.1                          | 23.3             |
| Authentic | Niclosamide                                 | <0.39                     | >100                          | ---              |
| Authentic | Flunarizine                                 | 16.3                      | >100                          | 29.3             |
| 1         | NPD6621                                     | 49.4                      | ---                           | ---              |
| 1         | NPD8902                                     | 26.6                      | >100                          | 21.7             |
| 2         | NPD6383                                     | 23.8                      | ---                           | ---              |
| 2         | NPD602                                      | 14.4                      | ---                           | ---              |
| 2         | NPD8034                                     | 12.5                      | >100                          | 11               |
| 2         | NPD1450                                     | 16.3                      | >100                          | >50              |
| 2         | NPD6380                                     | 15.6                      | >100                          | 21.6             |
| 3         | NPD8582                                     | 13.8                      | ---                           | ---              |
| 3         | NPD8298                                     | 2.6                       | >100                          | >50              |
| 3         | NPD6240                                     | 7.7                       | >100                          | 21.6             |
| 3         | FSL0005                                     | 0.9                       | 3.4                           | 6.3              |
| 3         | NPD8366                                     | 11.9                      | >100                          | 18.8             |
| 4         | NPD10504                                    | 12.5                      | >100                          | 26.1             |
| 4         | NPD3577                                     | 12.5                      | >100                          | 20.9             |
| 4         | NPD6303                                     | 25.5                      | >100                          | 38.5             |
| 4         | NPD8790                                     | 14.5                      | >100                          | >50              |
| 5         | NPD10211                                    | 17.7                      | ---                           | ---              |
| 5         | NP974                                       | 21.4                      | ---                           | ---              |
| 5         | NPD390                                      | 17                        | 48.9                          | >50              |
| 6         | NPL50654-01                                 | 8.1                       | 26.1                          | 3.8              |
| 7         | 6-heptadeca-9Z,12Z-dienyl<br>salicylic acid | 3.5                       | ---                           | ---              |
| 7         | Anacardic Acid                              | 5.6                       | >100                          | >50              |
| Growth    | NPD5176                                     | ---                       | 94                            | >50              |
| Growth    | NPD5219                                     | ---                       | 43.02                         | 16.7             |
| Growth    | HTD0465                                     | ---                       | 38.2                          | 18.8             |
| Growth    | STK418118                                   | ---                       | 44.1                          | >50              |
